# Supplementary material
Source: MDPI journal article supplement (https://www.mdpi.com/2227-7390/12/10/1536)

- Go to <https://aibio.shinyapps.io/maGENEgerZ/>
- Upload the dataset from Datasets folder within Supplementary Materials. Suppose we upload Dataset1 named "GSE130787". Then, we have the following.

The screenshot displays the maGENEgerZ web application interface. The browser address bar shows the URL <https://aibio.shinyapps.io/maGENEgerZ/>. The main heading reads: "maGENEgerZ: An Efficient AI-Based Framework Can Extract More Expressed Genes and Biological Insights Underlying Breast Cancer Drug Response Mechanism".

**Step 1: Uploading CSV file:** Note that columns correspond to genes and rows to samples. An "Upload..." button is present, and a message "GSE130787" is displayed above an "Upload complete" button.

**Step 2: Computational Method**

The "esvm" method is selected, indicated by a blue radio button. A "Download" button is visible below the selection.

A diagram illustrates the progression of breast cancer: "Cancer cells (small tumor)" → "Cancer cells (medium tumor)" → "Cancer cells (large tumor)" → "Cancer cells (metastasizing)" → "Cancer cells (apoptosis)". The diagram shows a breast cross-section with a tumor growing and then a human figure with a tumor and a red ribbon symbol.

A progress bar at the bottom right indicates "esvm Calculation in progress This may take a while..."

By default, esvm is selected and a progress bar showing the computation status.

After completion, we click on download button to download the results, shown as in the following screen.

maGENEgerZ: An Efficient AI-Based Genes and Biological Insights Under Mechanism

Step 1: Uploading CSV file: Note that columns correspond to genes and rows to samples

Upload... GSE130787

Upload complete

Step 2: Computational Method

☒ esvm

Download

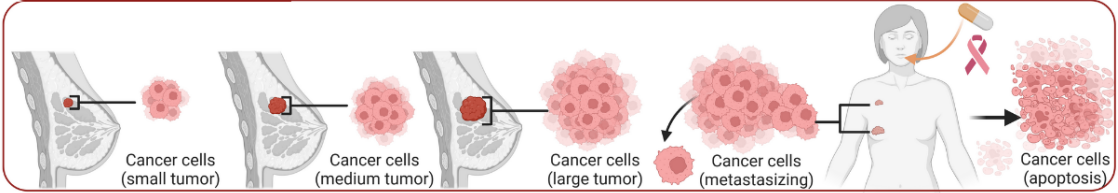

-Now, we open the results in excel file shown as follows

AutoSave Off    

esvm\_genes.csv • Saved to this PC 

FileHomeInsertPage LayoutFormulasDataReviewViewAutomate

  
Paste  


Calibri11A<sup>^</sup>A<sub>v</sub>

**B***I*U  
Font

  
Alignment

R1C1



SV2B

|    | 1       | 2 | 3 | 4 | 5 | 6 | 7 | 8 | 9 |
|----|---------|---|---|---|---|---|---|---|---|
| 1  | SV2B    |   |   |   |   |   |   |   |   |
| 2  | NELL2   |   |   |   |   |   |   |   |   |
| 3  | PNMT    |   |   |   |   |   |   |   |   |
| 4  | GRP     |   |   |   |   |   |   |   |   |
| 5  | CAPN13  |   |   |   |   |   |   |   |   |
| 6  | MATN3   |   |   |   |   |   |   |   |   |
| 7  | HMGCS2  |   |   |   |   |   |   |   |   |
| 8  | MAN1C1  |   |   |   |   |   |   |   |   |
| 9  | DUSP13  |   |   |   |   |   |   |   |   |
| 10 | FOS     |   |   |   |   |   |   |   |   |
| 11 | CYTL1   |   |   |   |   |   |   |   |   |
| 12 | INSM1   |   |   |   |   |   |   |   |   |
| 13 | GLI3    |   |   |   |   |   |   |   |   |
| 14 | OBP2A   |   |   |   |   |   |   |   |   |
| 15 | CCL21   |   |   |   |   |   |   |   |   |
| 16 | AQP3    |   |   |   |   |   |   |   |   |
| 17 | PTP4A3  |   |   |   |   |   |   |   |   |
| 18 | APLN    |   |   |   |   |   |   |   |   |
| 19 | ANGPTL7 |   |   |   |   |   |   |   |   |
| 20 | TRIM63  |   |   |   |   |   |   |   |   |
| 21 | TMEM61  |   |   |   |   |   |   |   |   |
| 22 | HSD17B2 |   |   |   |   |   |   |   |   |
| 23 | CD70    |   |   |   |   |   |   |   |   |
| 24 | KCNS3   |   |   |   |   |   |   |   |   |
| 25 | LBH     |   |   |   |   |   |   |   |   |
| 26 | CHI3L2  |   |   |   |   |   |   |   |   |
| 27 | LGALS2  |   |   |   |   |   |   |   |   |
| 28 | PPBP    |   |   |   |   |   |   |   |   |



esvm\_genes



Supplement: s1 [file s1]
