# Supplementary material
Source: MDPI journal article supplement (https://www.mdpi.com/2227-7390/12/10/1536)
Supplement: s1 [file s1]

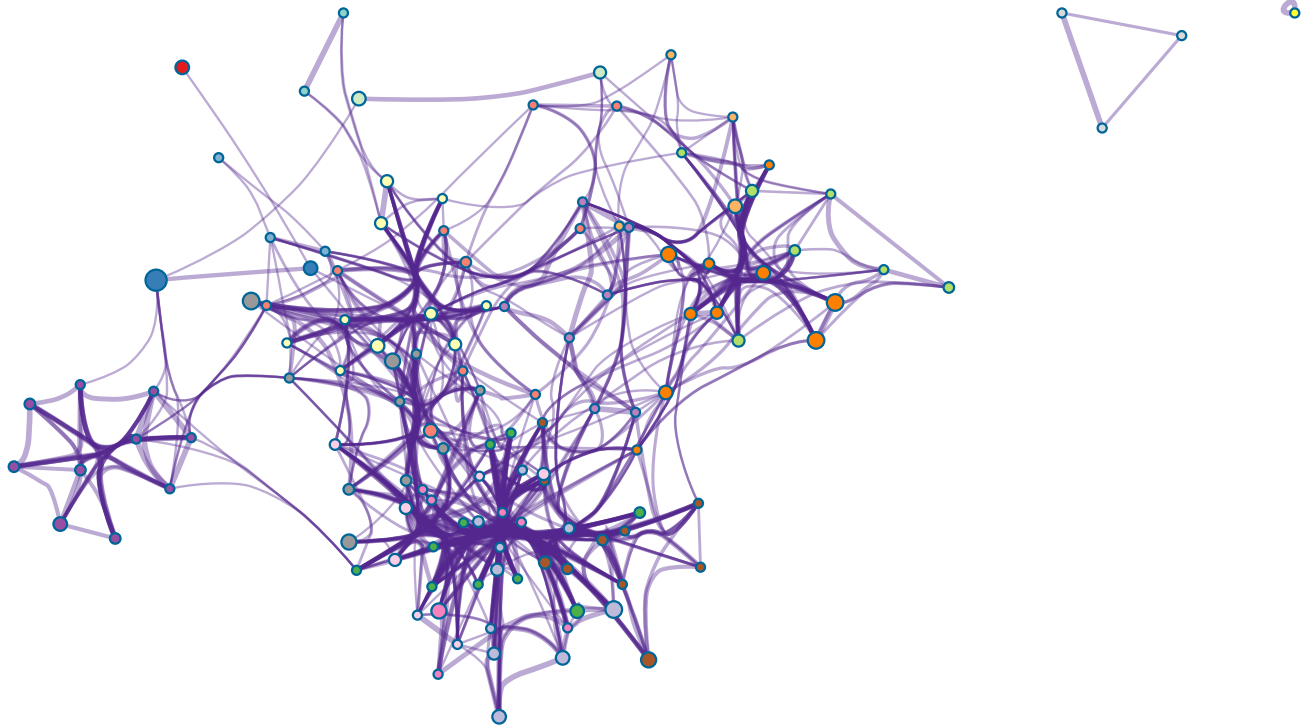

- Vitamin D receptor pathway
- NABA MATRISOME ASSOCIATED
- mammary gland development
- Extracellular matrix organization
- regulation of secretion by cell
- Gonadotropin-releasing hormone receptor pathway
- bone morphogenesis
- glandular epithelial cell differentiation
- cellular response to lipid
- PPAR signaling pathway
- cellular response to hypoxia
- tube morphogenesis
- cAMP signaling pathway
- FCER1 mediated MAPK activation
- negative regulation of transport
- mast cell activation
- Hair follicle development: cytodifferentiation - part 3 o
- biogenic amine metabolic process
- feeding behavior
- positive regulation of defense response
