# Supplementary material
Source: MDPI journal article supplement (https://www.mdpi.com/2227-7390/12/10/1536)
Supplement: s1 [file s1]

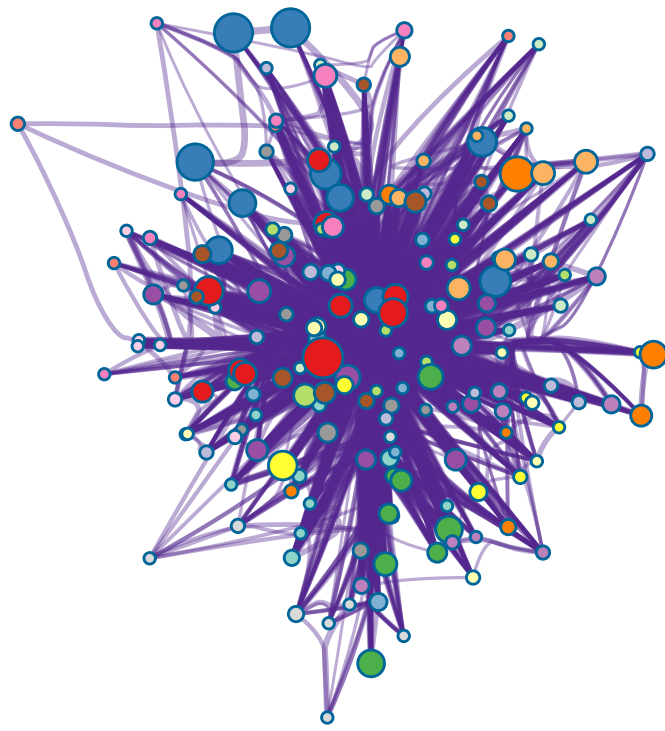

- Pathways in cancer
- EGFR tyrosine kinase inhibitor resistance
- Androgen receptor network in prostate cancer
- Leptin signaling pathway
- phosphorylation
- Pleural mesothelioma
- PI3K/AKT Signaling in Cancer
- gland development
- Pathways affected in adenoid cystic carcinoma
- Melanoma
- RAC1/PAK1/p38/MMP2 pathway
- Factors and pathways affecting insulin-like growth fac
- PID TCPTP PATHWAY
- Androgen receptor signaling pathway
- positive regulation of cell migration
- regulation of growth
- MET in type 1 papillary renal cell carcinoma
- Apoptosis
- Platinum drug resistance
- Extra-nuclear estrogen signaling

 created by  
<http://metascape.org>
