# Supplementary material
Source: MDPI journal article supplement (https://www.mdpi.com/2227-7390/12/10/1536)
Supplement: s1 [file s1]

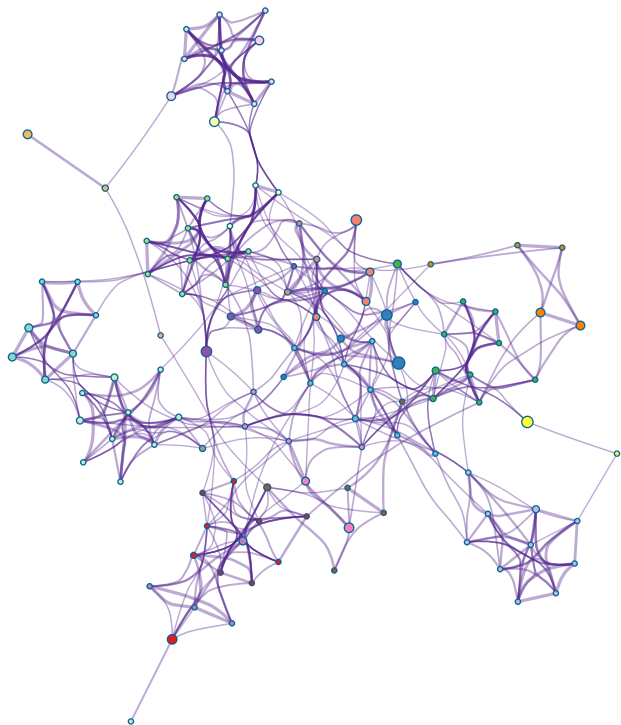

- Nuclear receptors meta-pathway
- regulation of growth
- sequestering of zinc ion
- Pathways in cancer
- response to metal ion
- Adaptive Immune System
- Biological oxidations
- Interleukin-4 and Interleukin-13 signaling
- Transcriptional misregulation in cancer
- regulation of protein serine/threonine kinase activity
- regulation of plasma lipoprotein particle levels
- Assembly of collagen fibrils and other multimeric structures
- response to hormone
- Orexin receptor pathway
- hormone metabolic process
- Cortisol synthesis and secretion
- phosphatidylcholine biosynthetic process
- Glucocorticoid receptor pathway
- Nuclear events mediated by NFE2L2
- Mitotic G1 phase and G1/S transition

 created by  
<http://metascape.org>
