# Supplementary material
Source: MDPI journal article supplement (https://www.mdpi.com/2227-7390/12/10/1536)

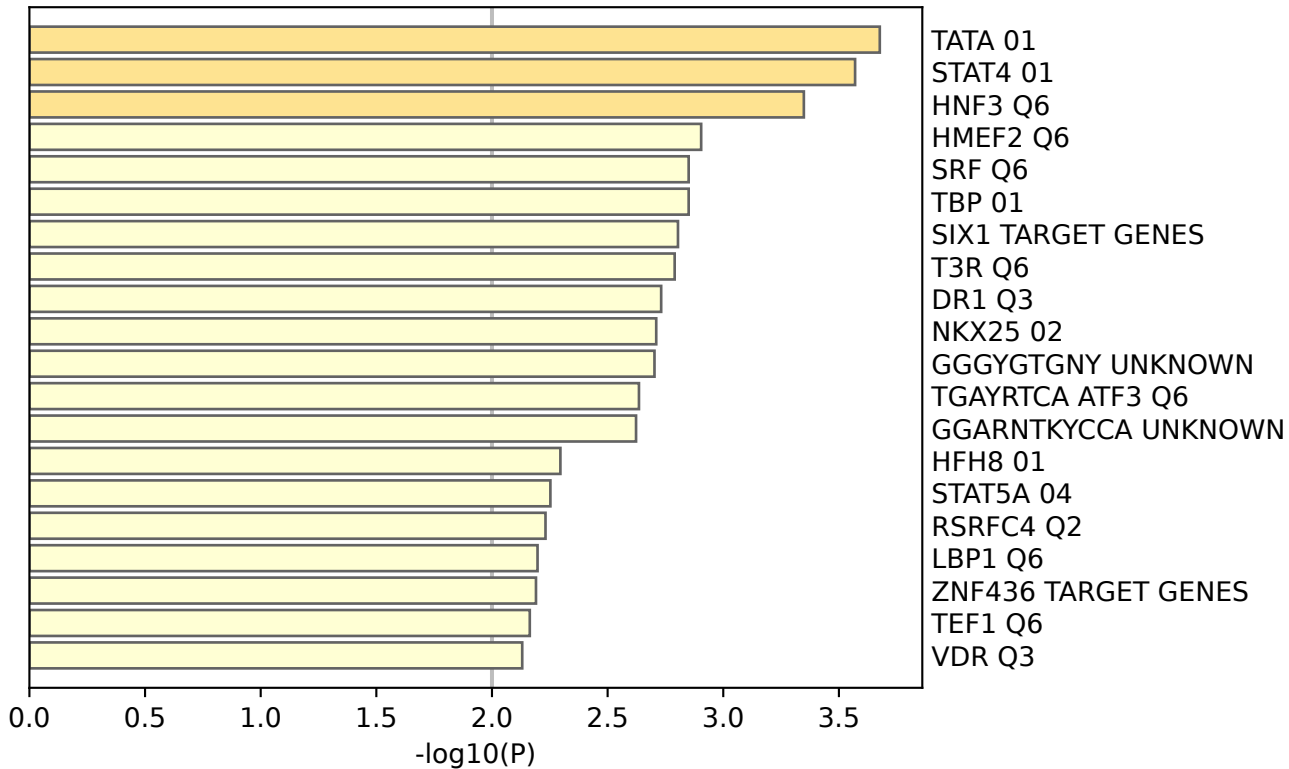

Supplement: s1 [file s1]

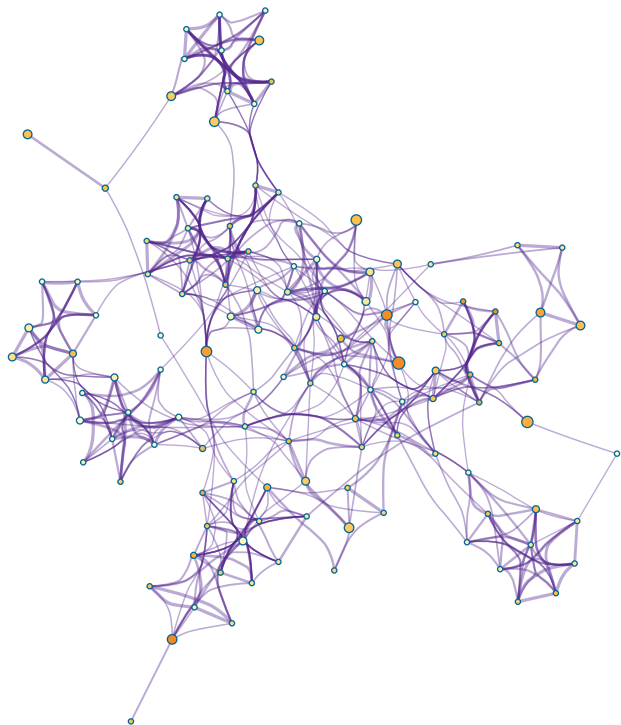

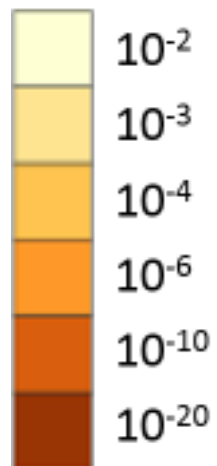

 created by  
<http://metascape.org>

Supplement: s1 [file s1]

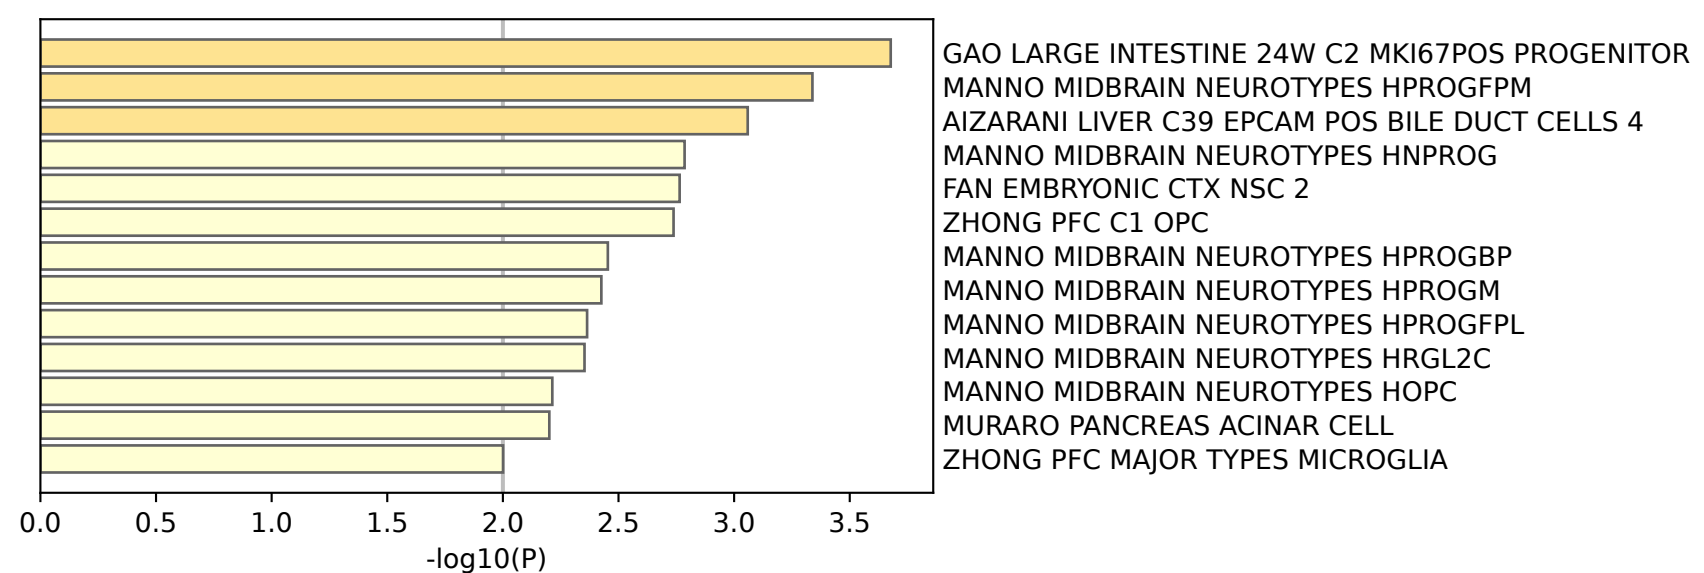

Supplement: s1 [file s1]

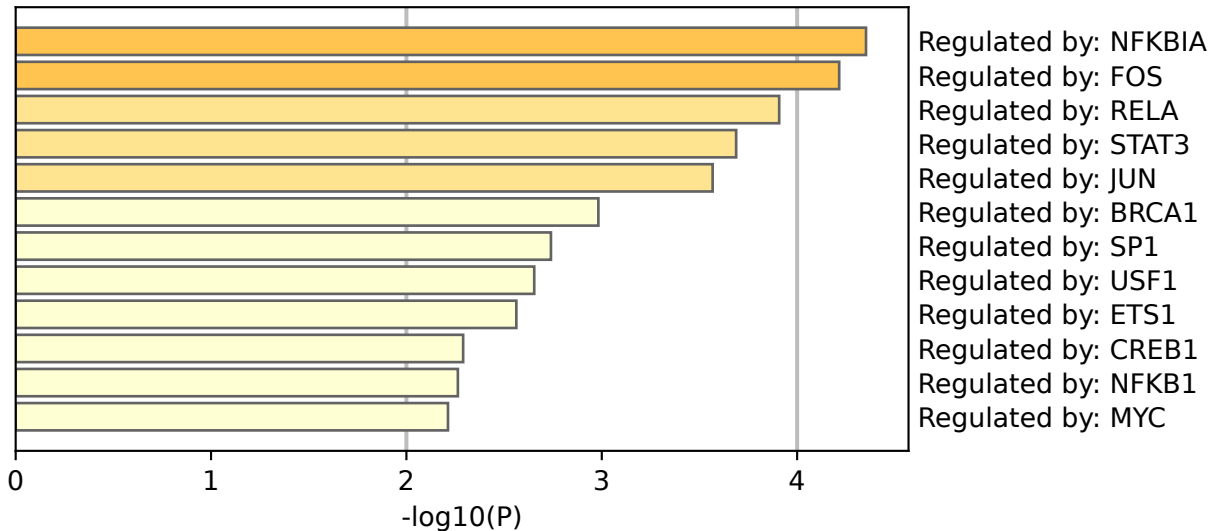

Supplement: s1 [file s1]

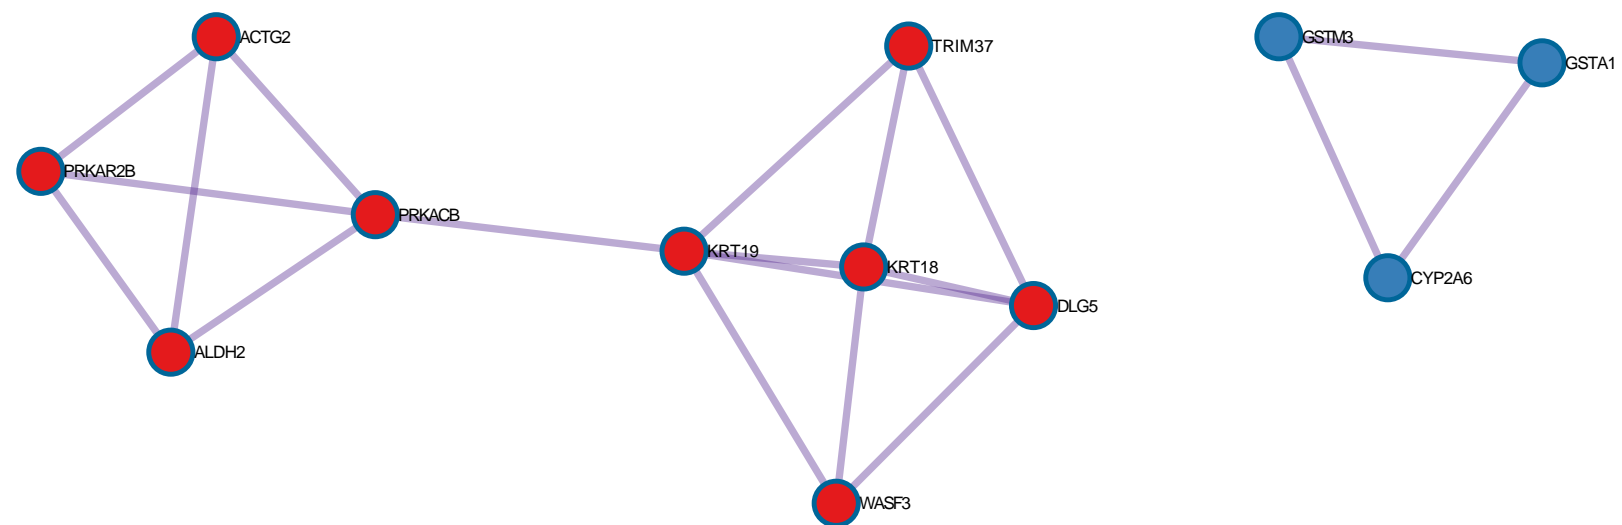

■ MCODE1  
■ MCODE2

 created by  
<http://metascape.org>

Supplement: s1 [file s1]

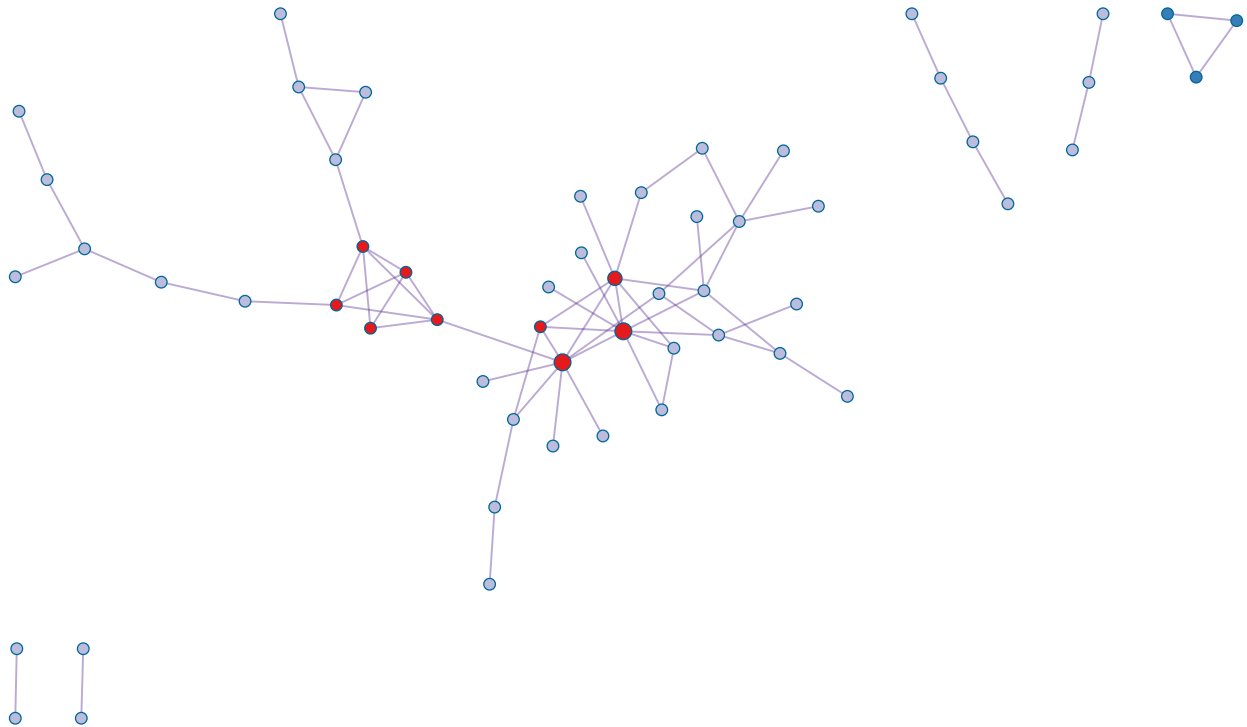

■ MCODE1  
■ MCODE2

 created by  
<http://metascape.org>

Supplement: s1 [file s1]

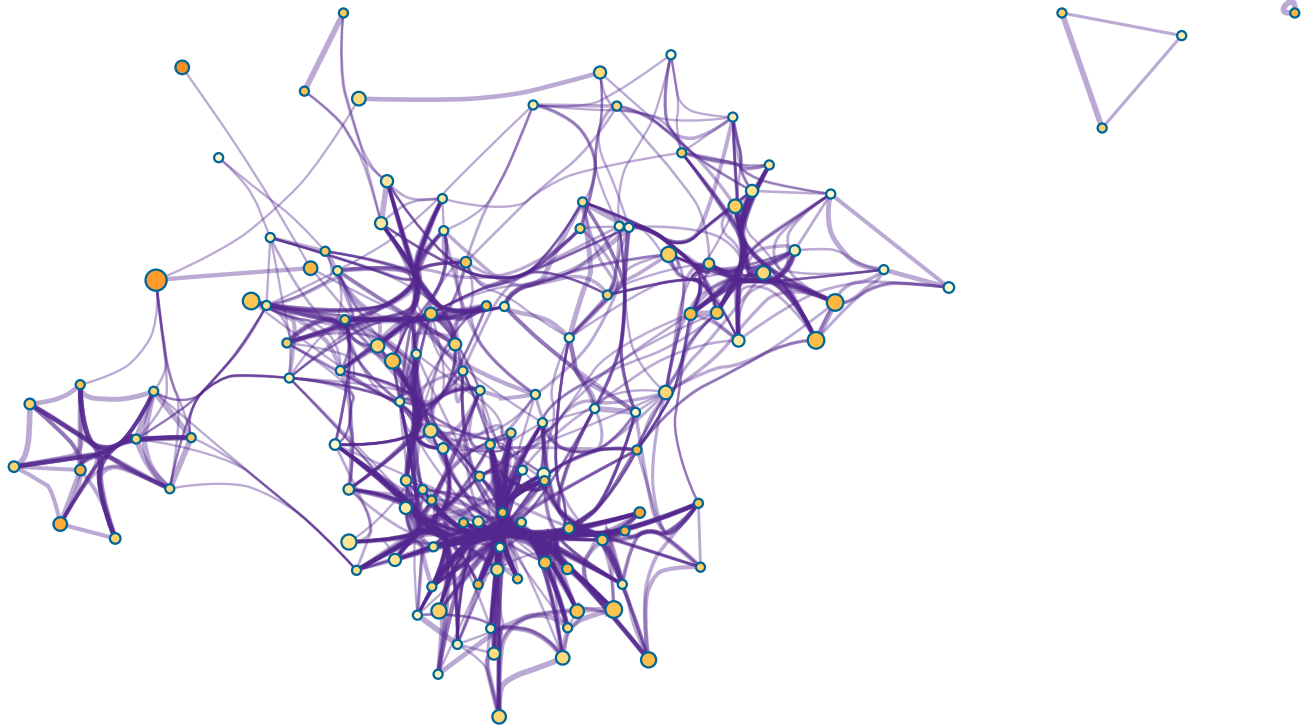



 created by  
<http://metascape.org>

Supplement: s1 [file s1]

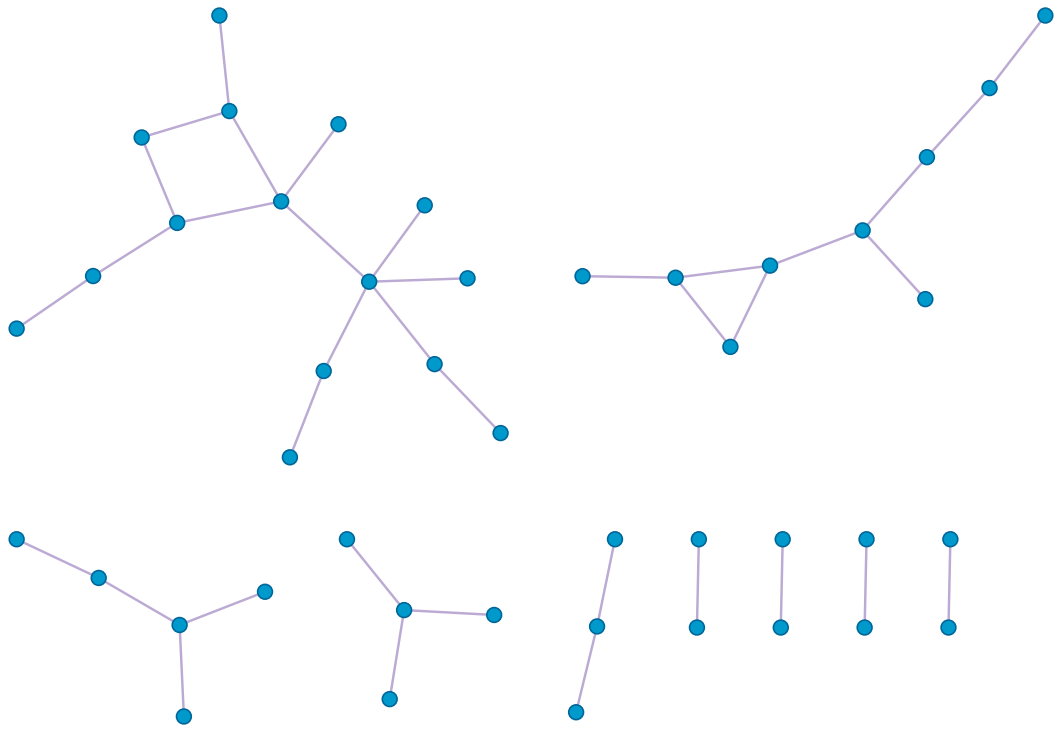

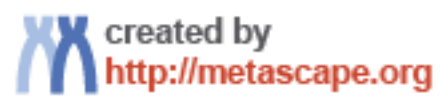

Supplement: s1 [file s1]

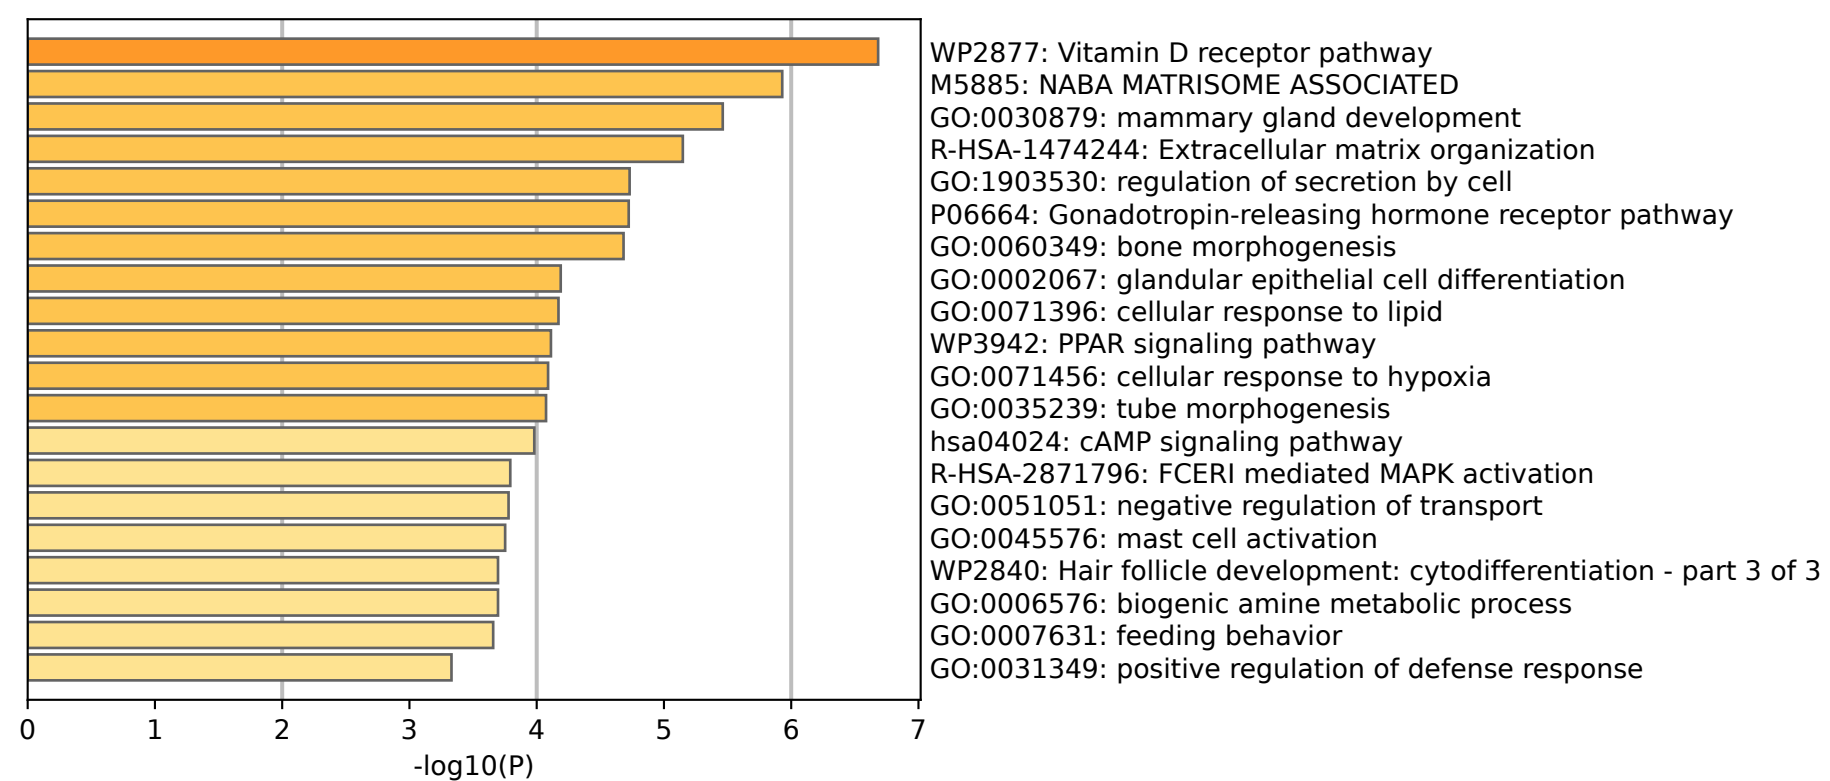

Supplement: s1 [file s1]

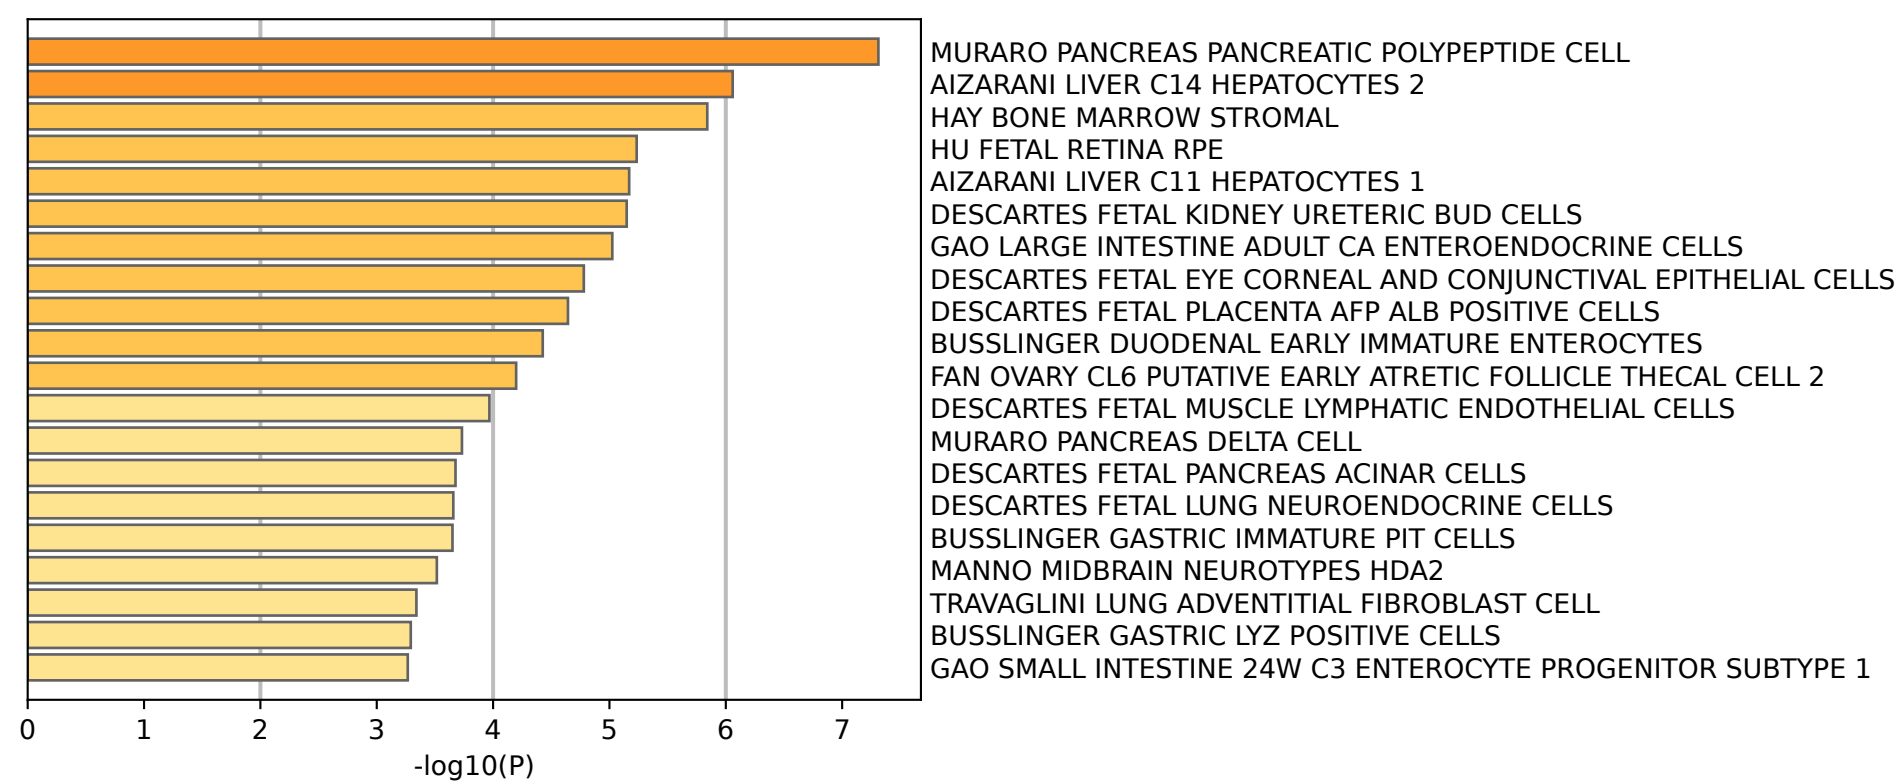

Supplement: s1 [file s1]

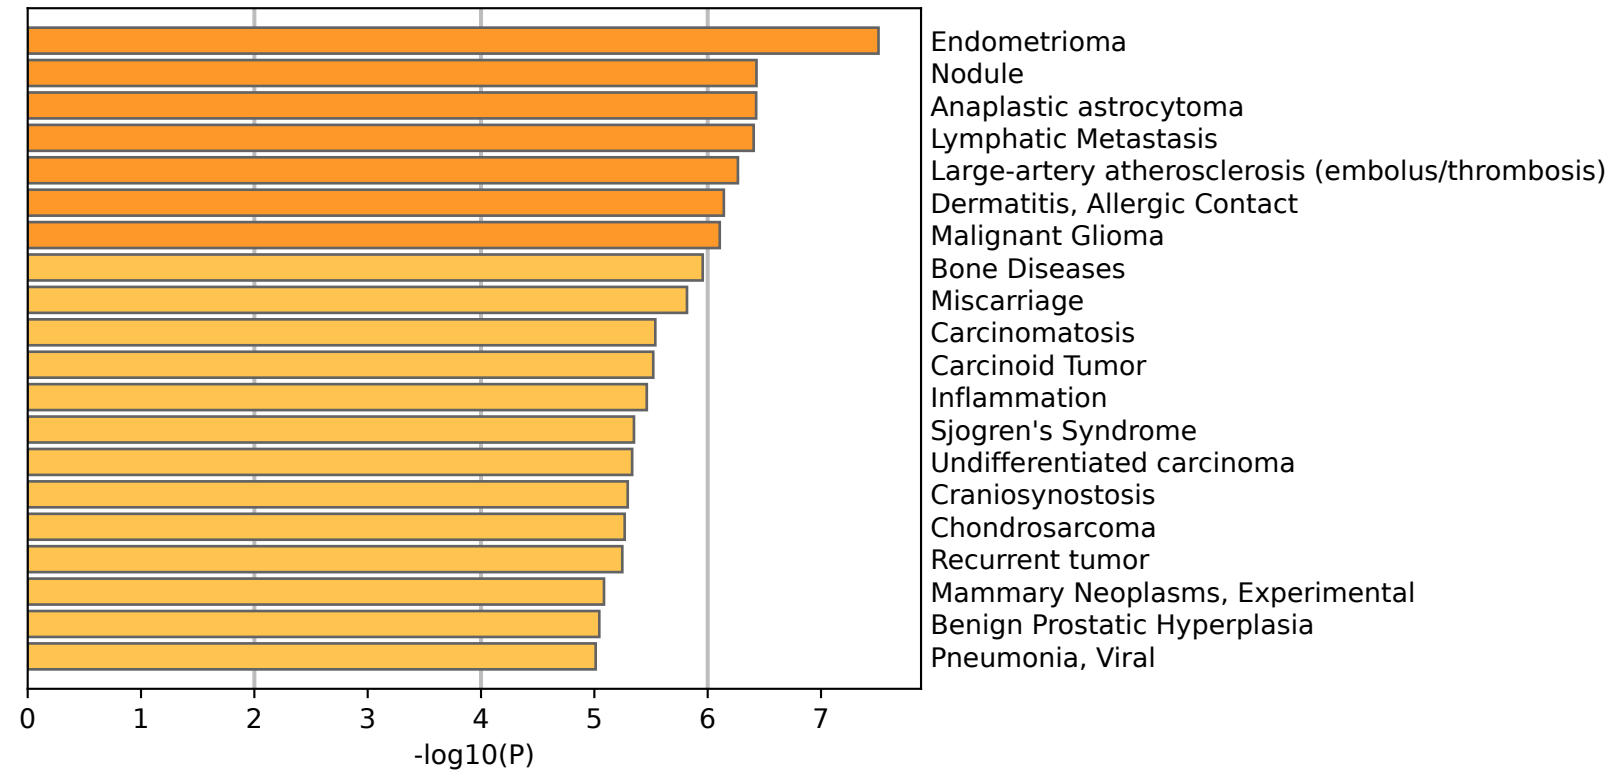

Supplement: s1 [file s1]

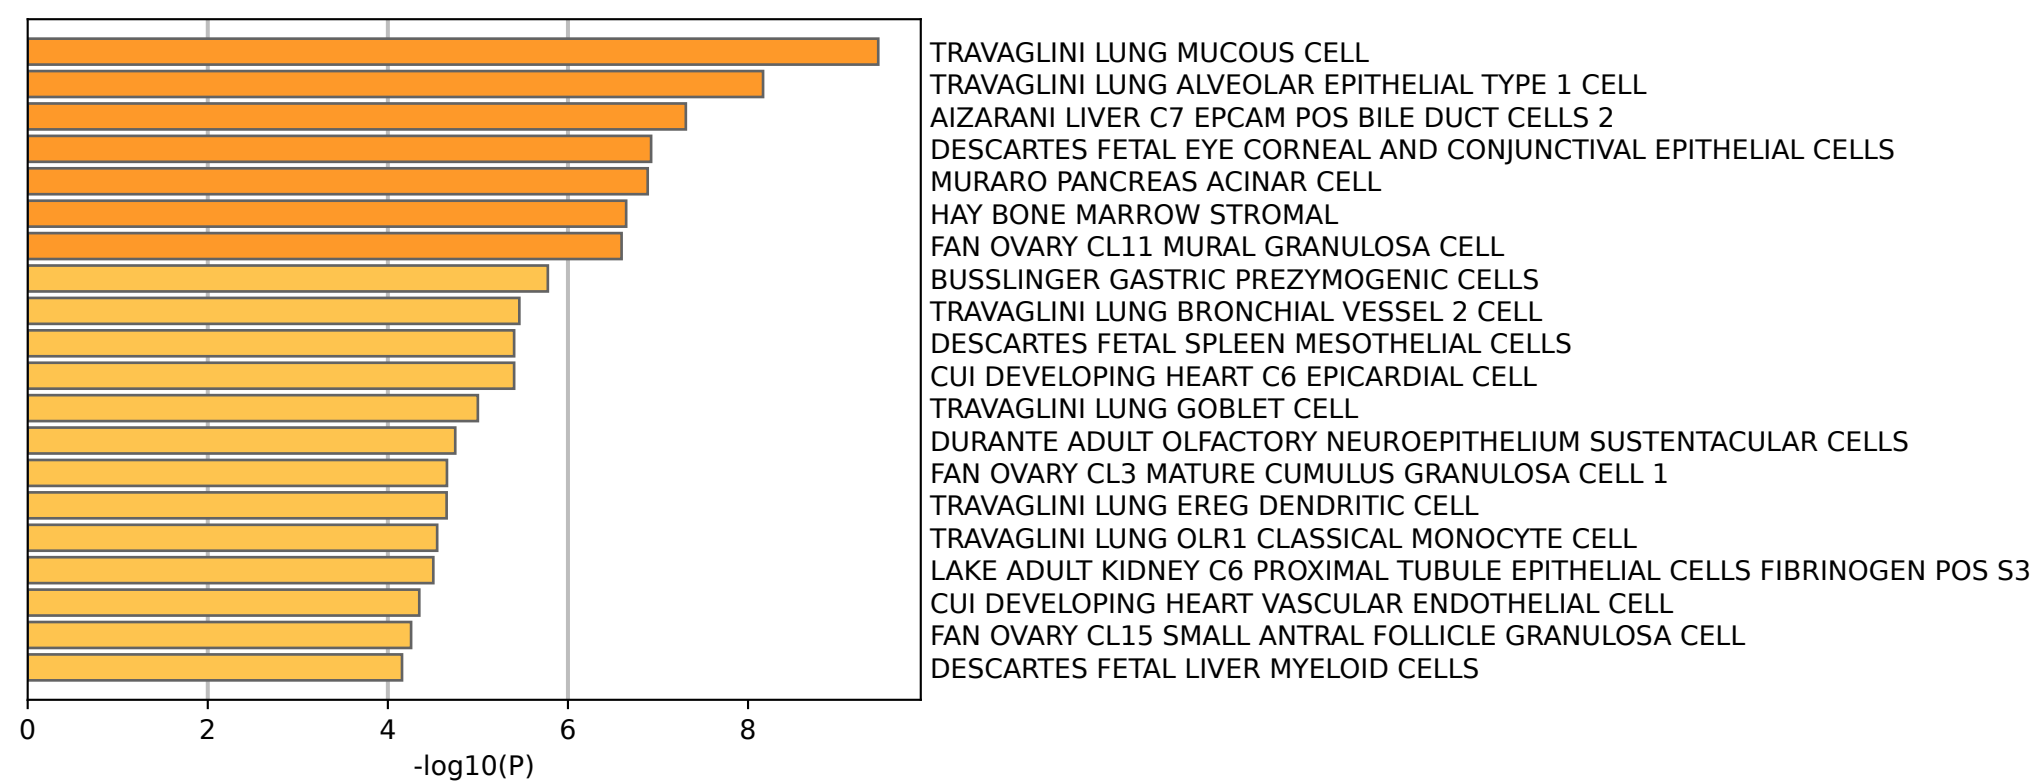

Supplement: s1 [file s1]

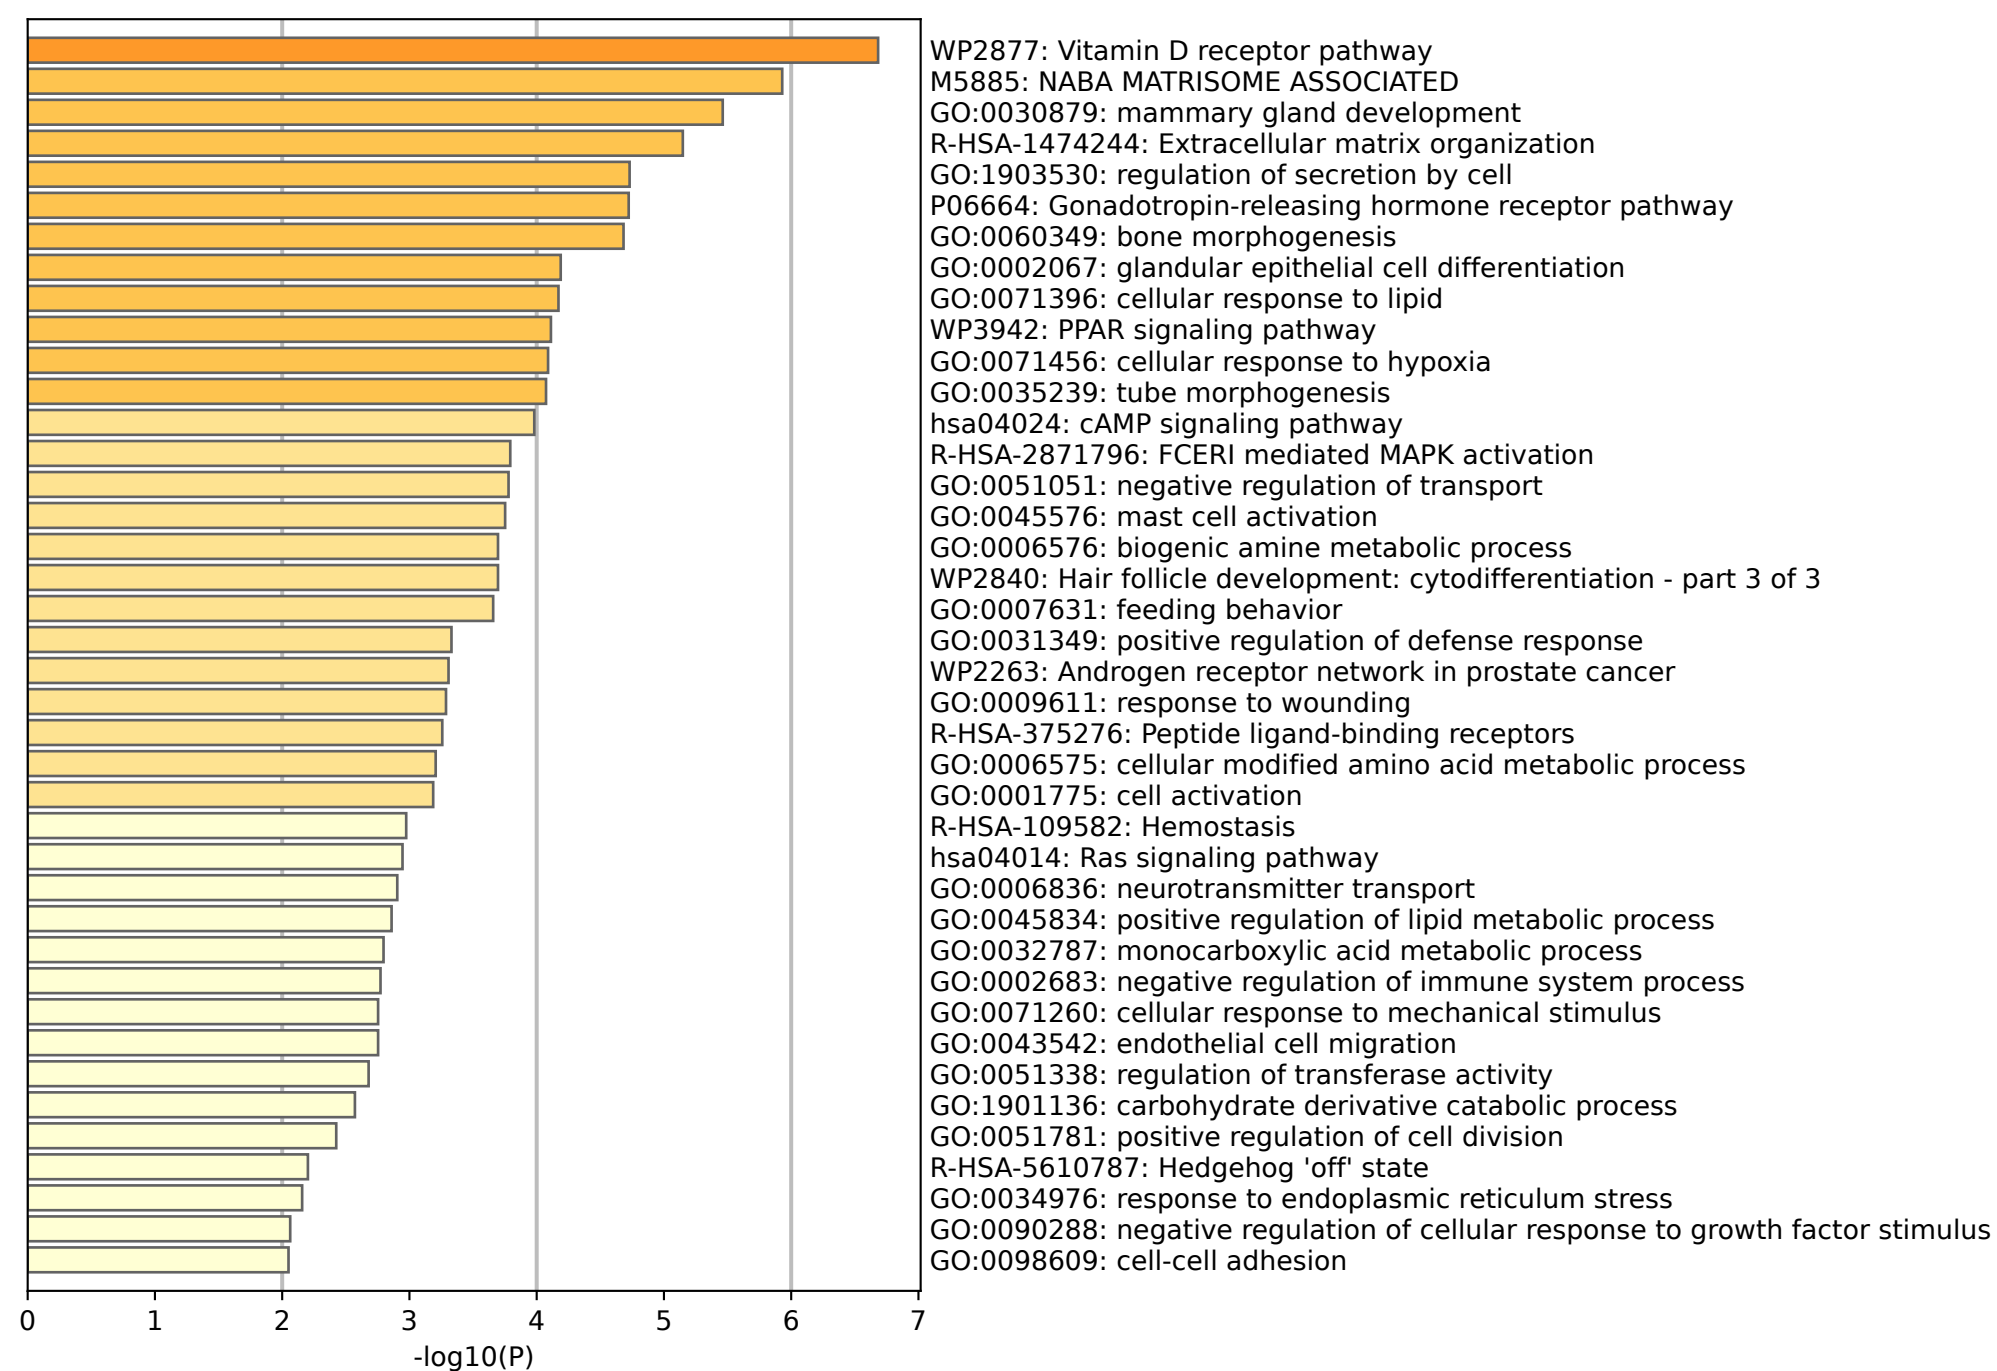

Supplement: s1 [file s1]

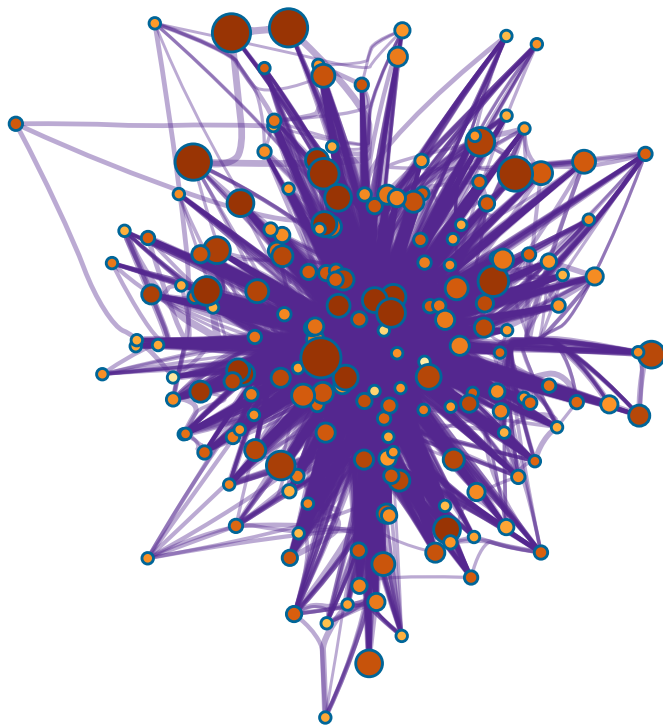



 created by  
<http://metascape.org>

Supplement: s1 [file s1]

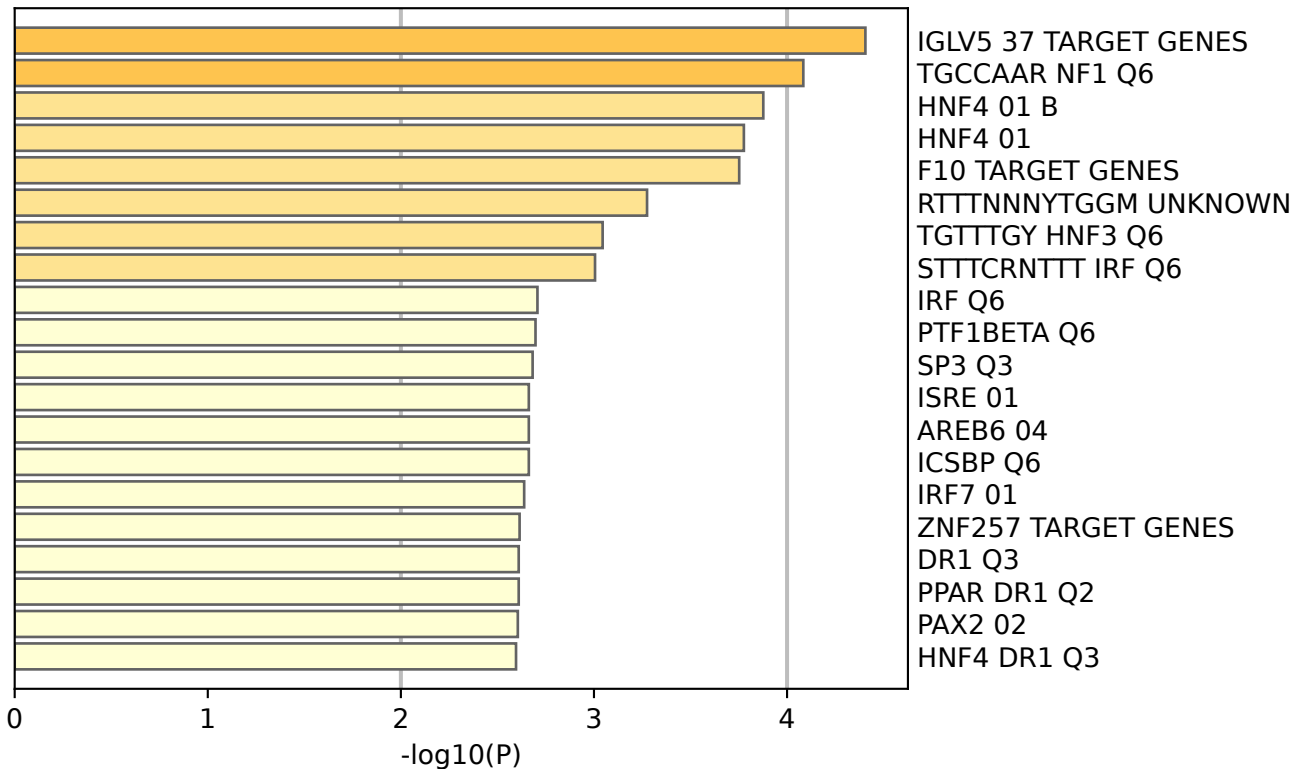

Supplement: s1 [file s1]

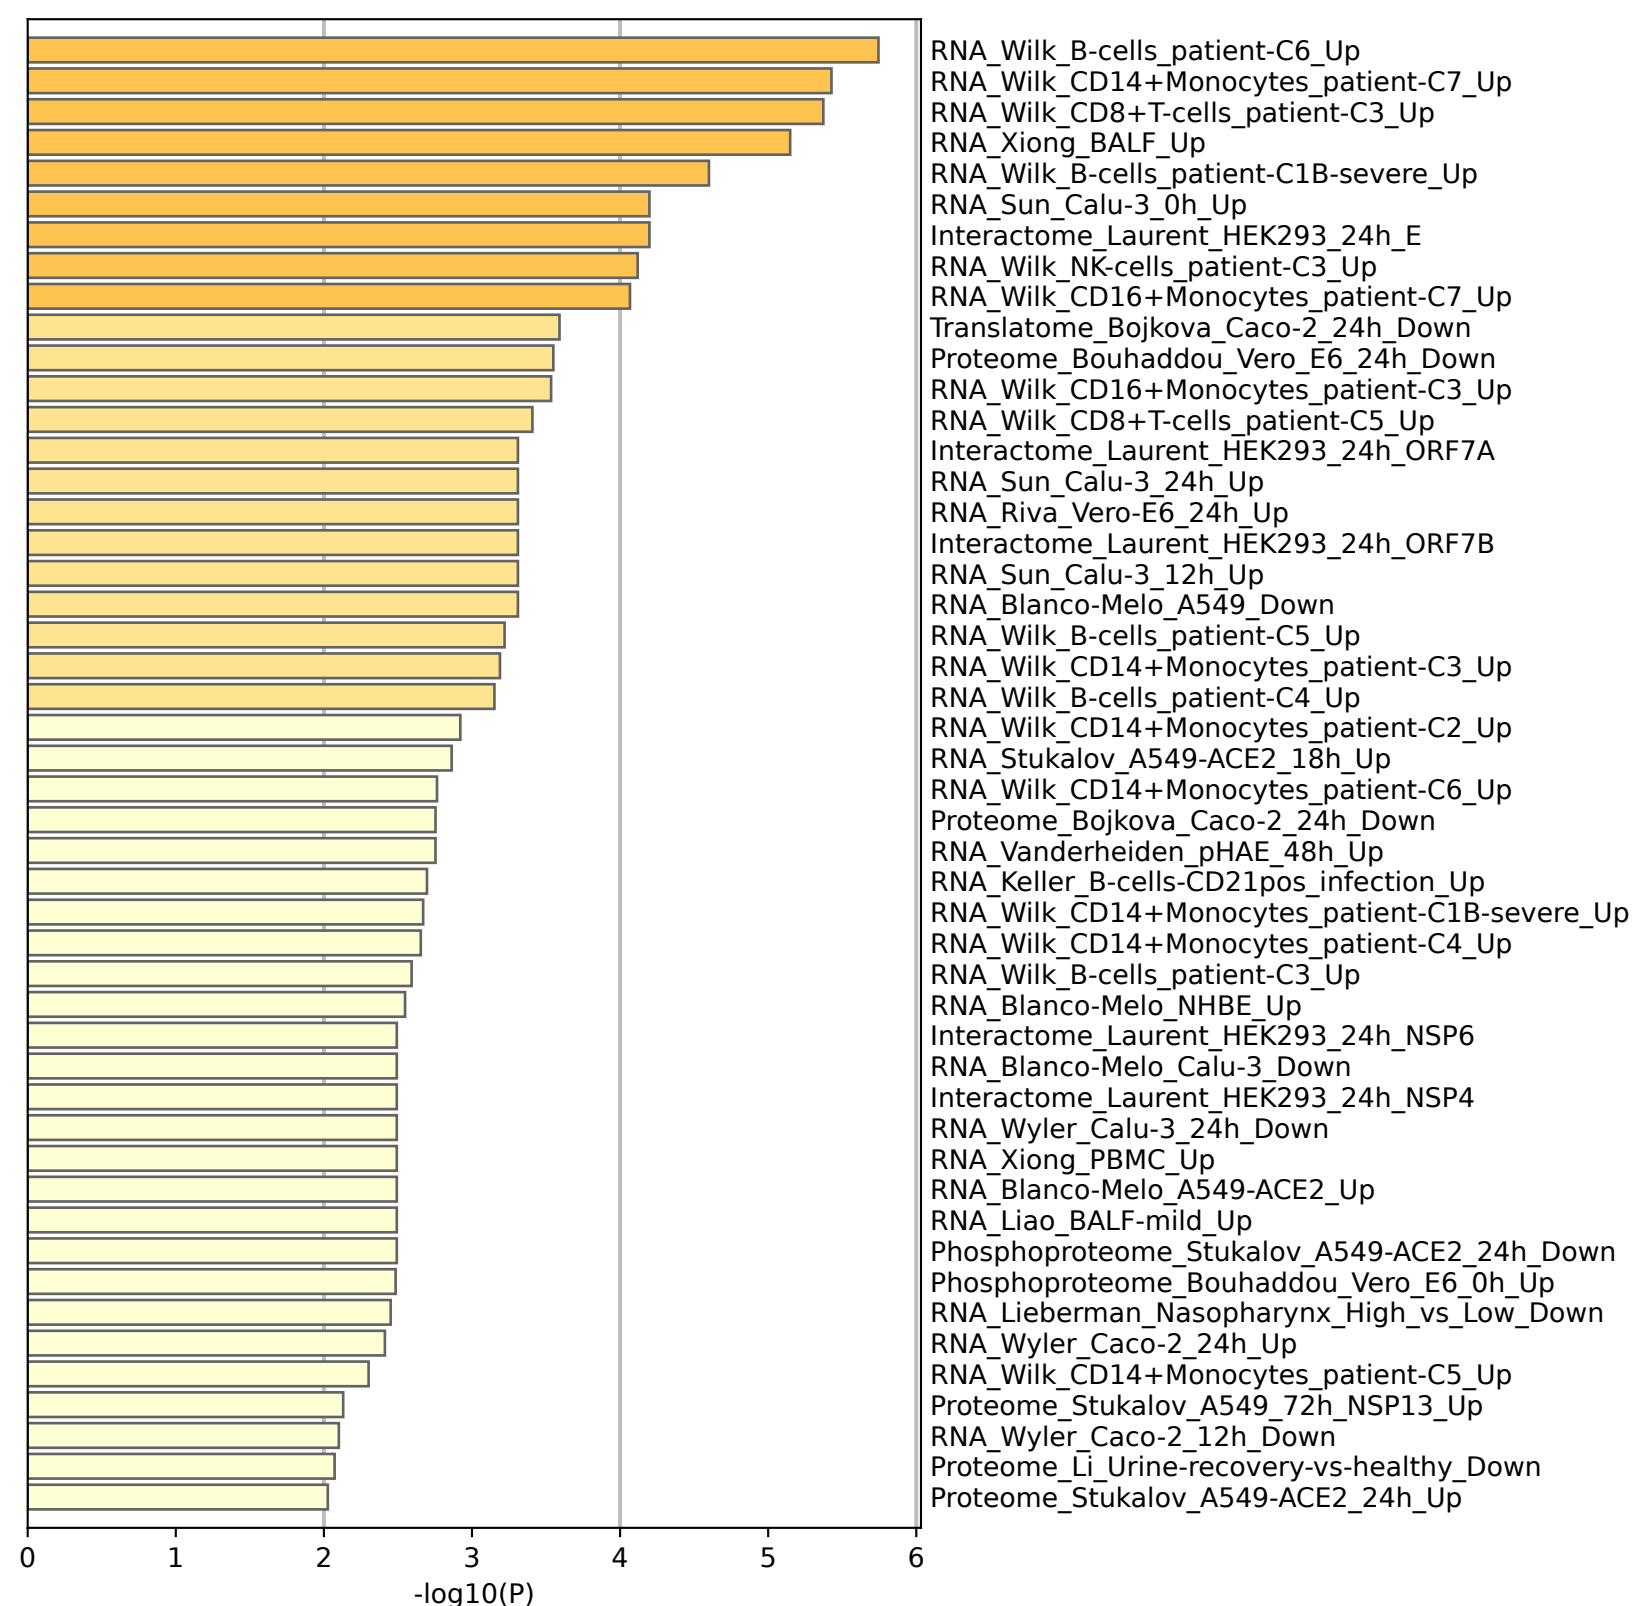

Supplement: s1 [file s1]

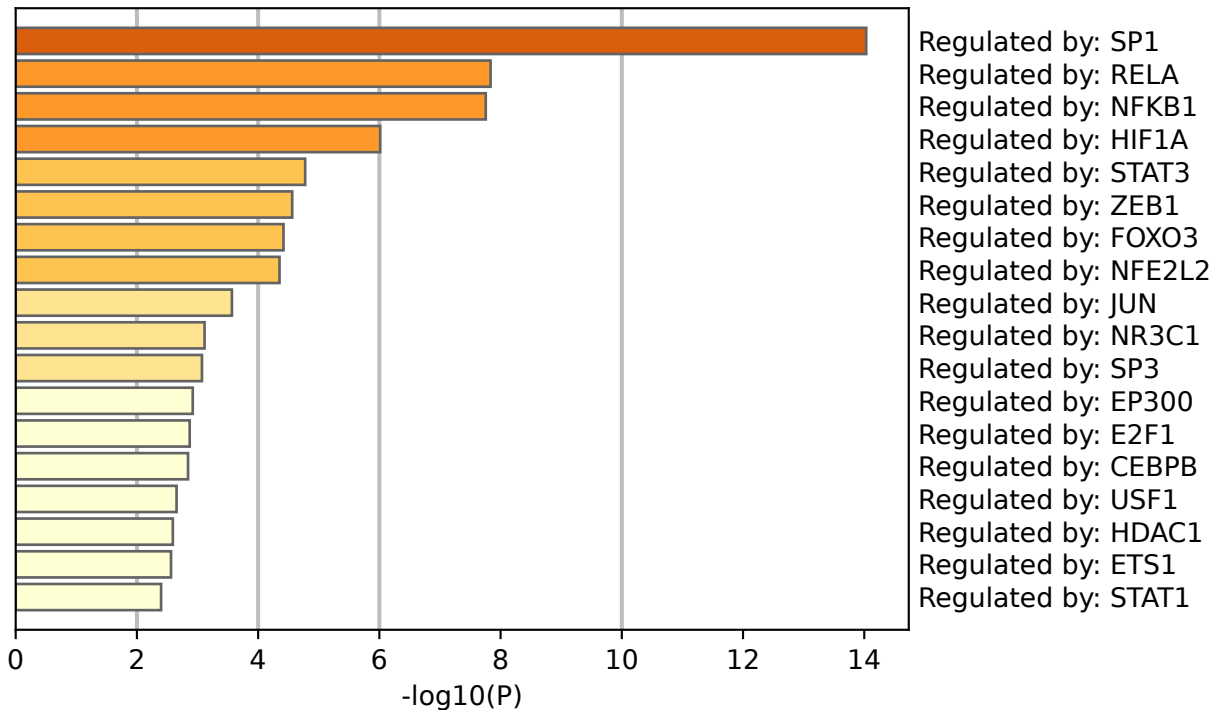

Supplement: s1 [file s1]

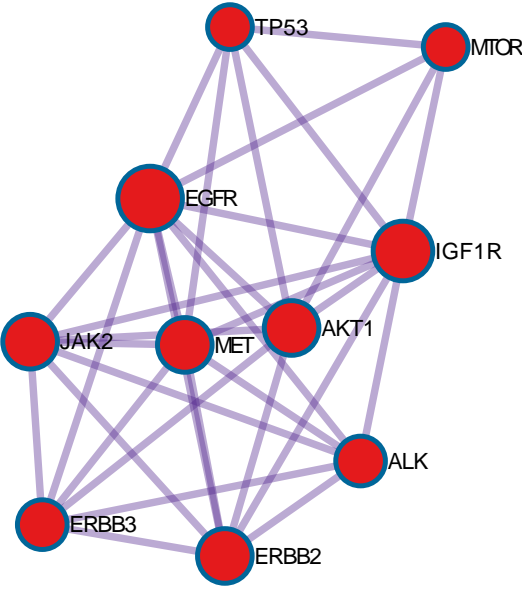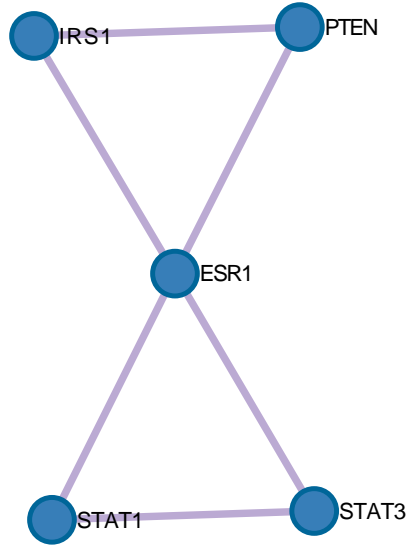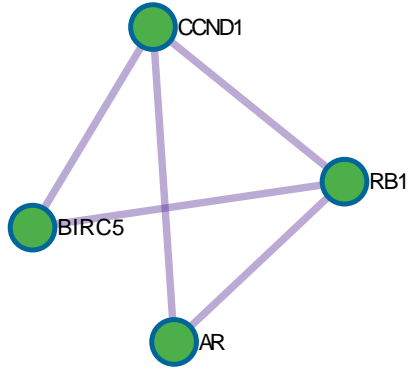

■ MCODE1  
■ MCODE2  
■ MCODE3

 created by  
<http://metascape.org>

Supplement: s1 [file s1]

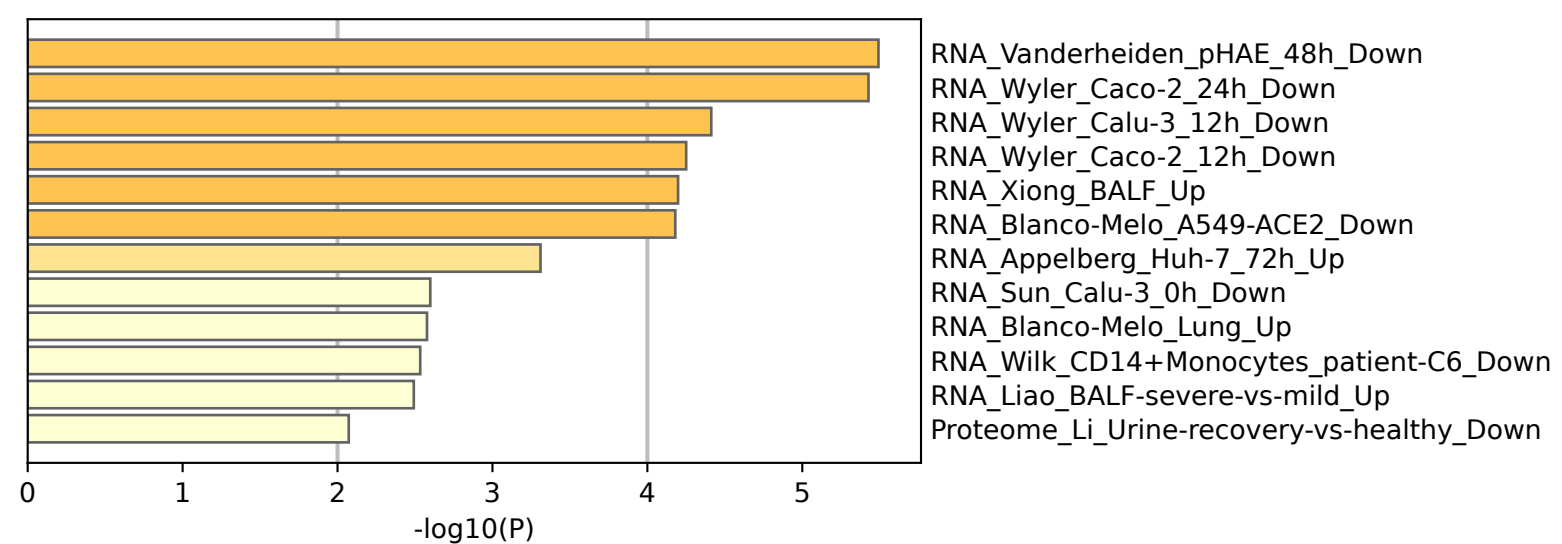

Supplement: s1 [file s1]

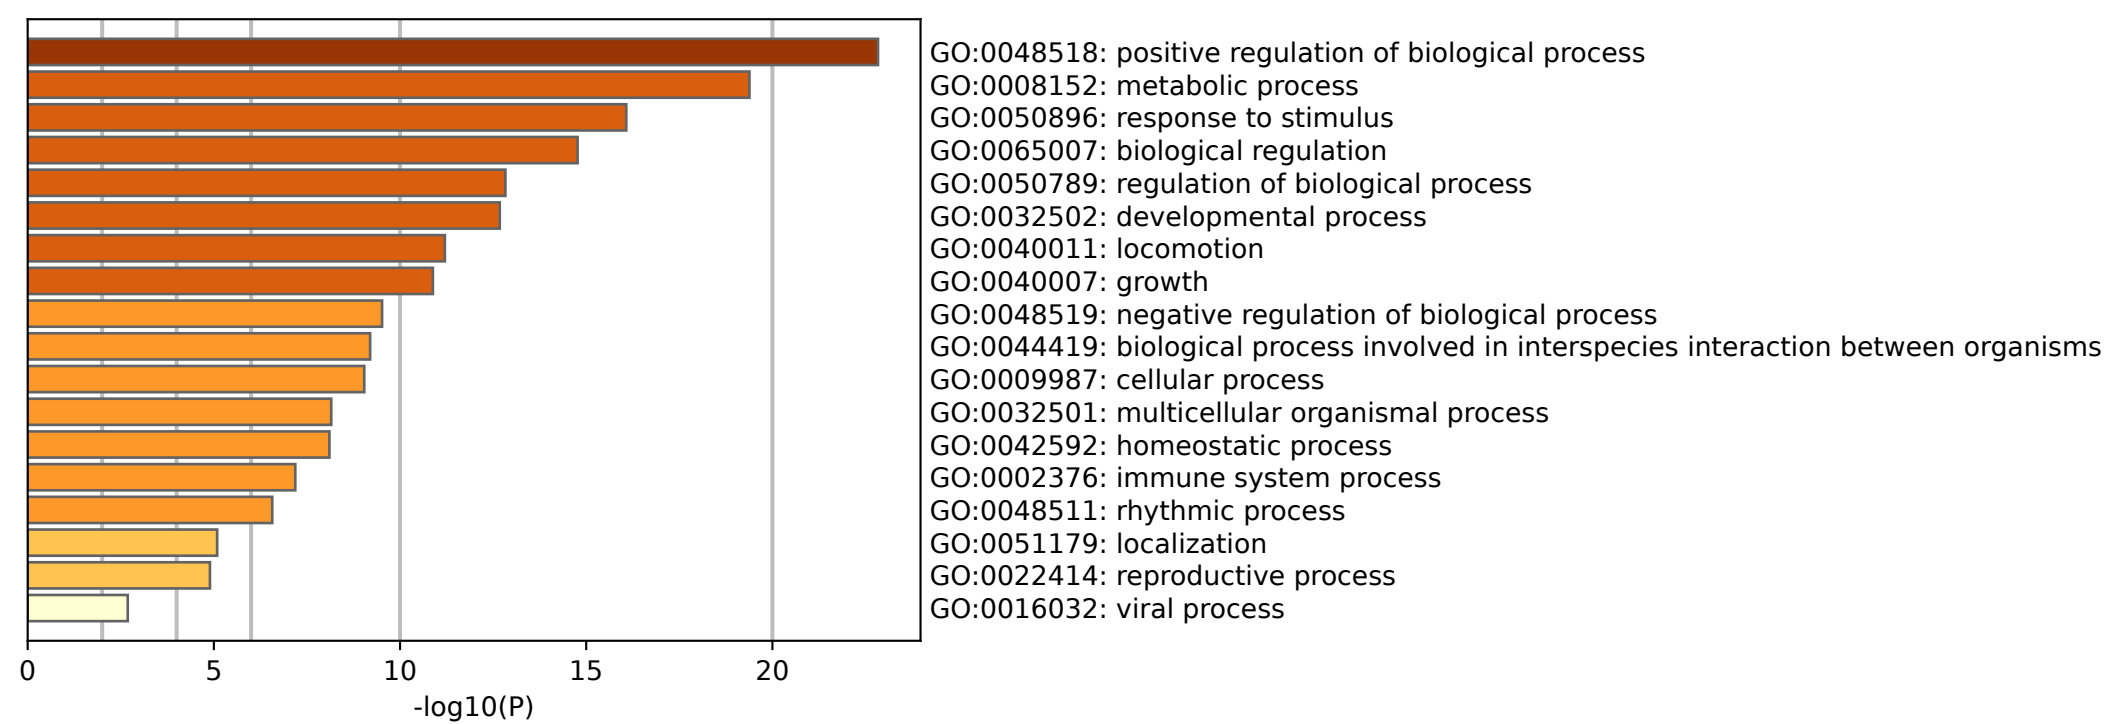

Supplement: s1 [file s1]

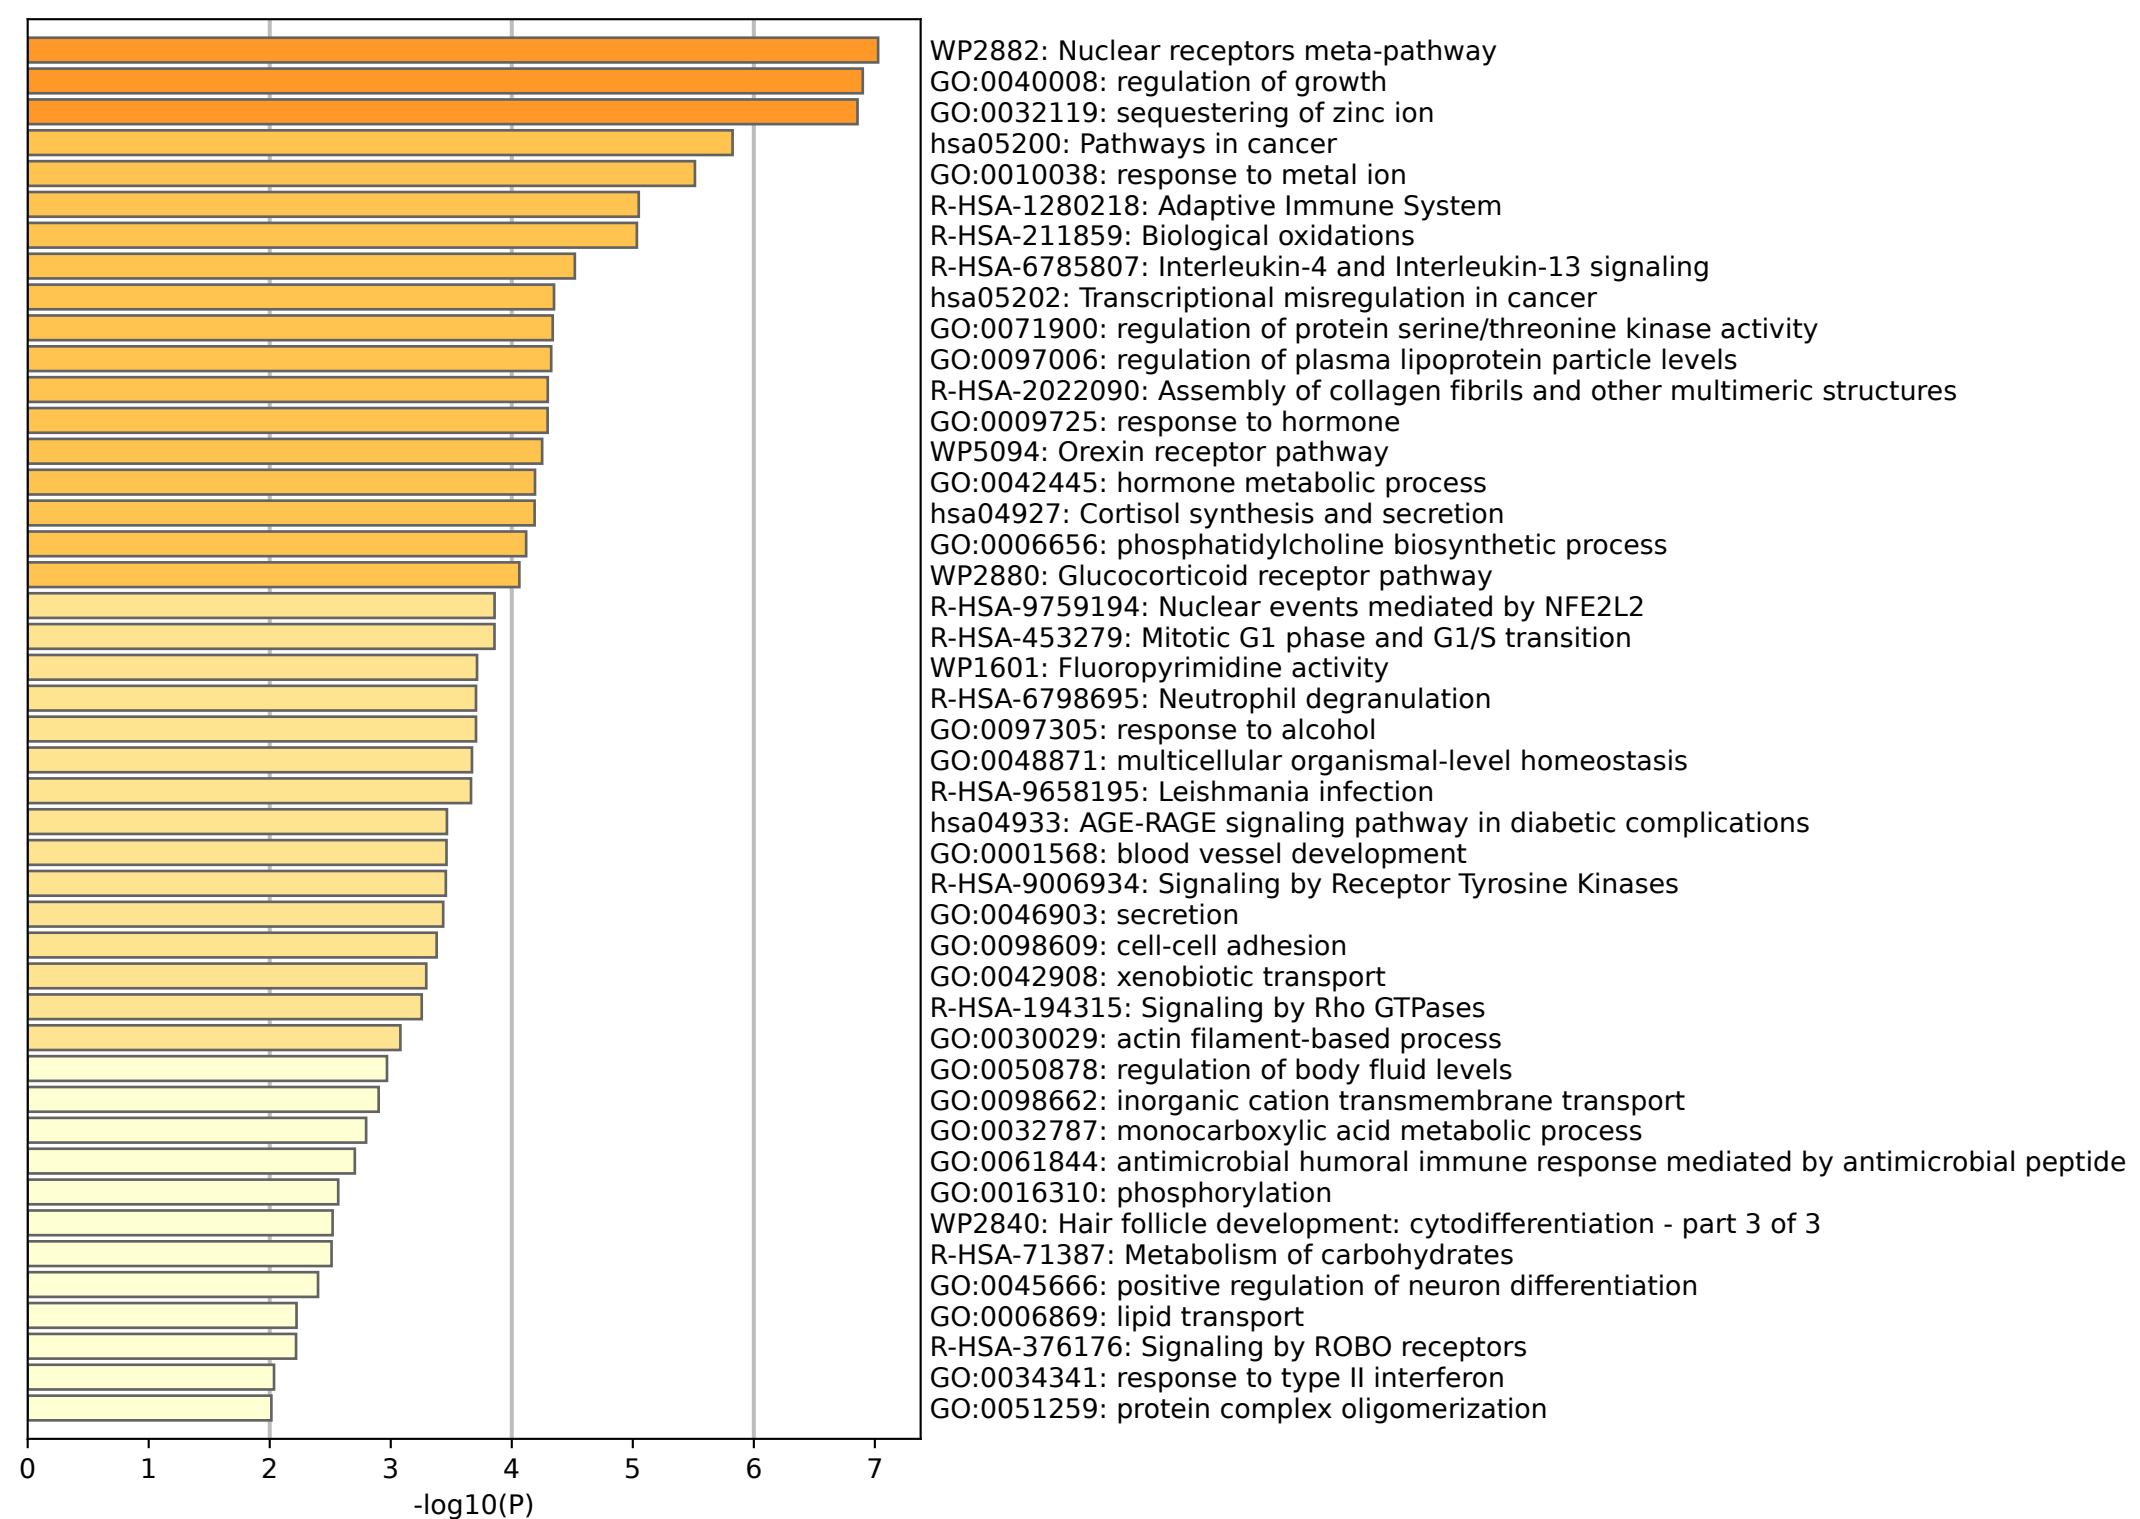

Supplement: s1 [file s1]

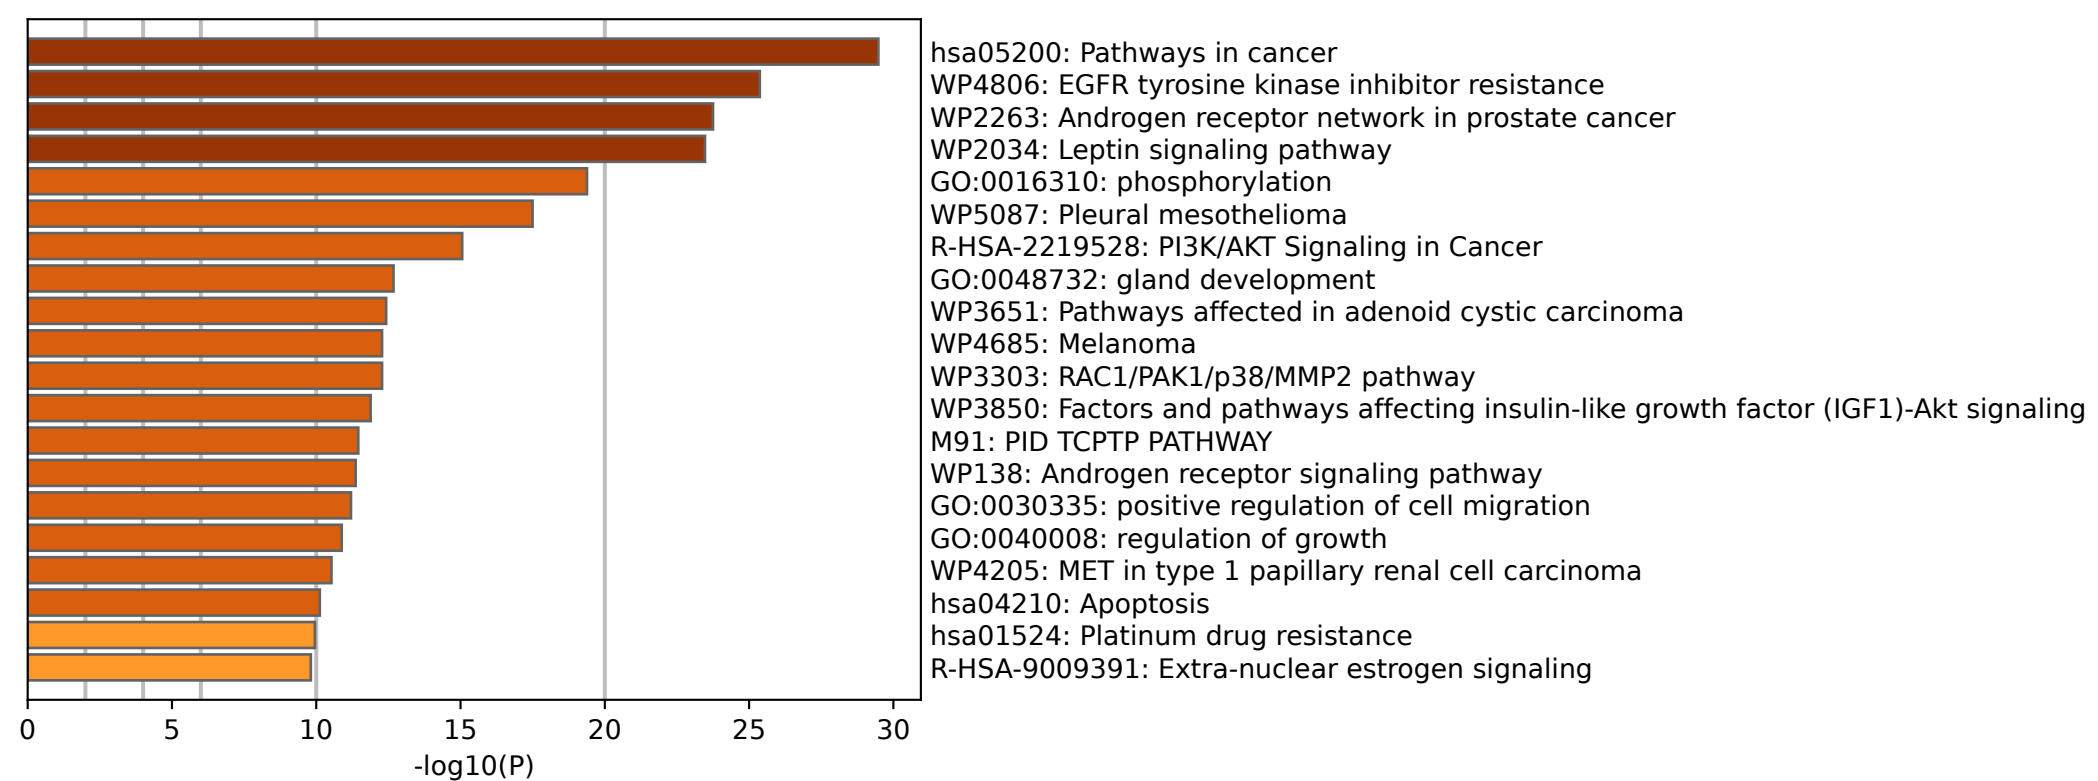

Supplement: s1 [file s1]

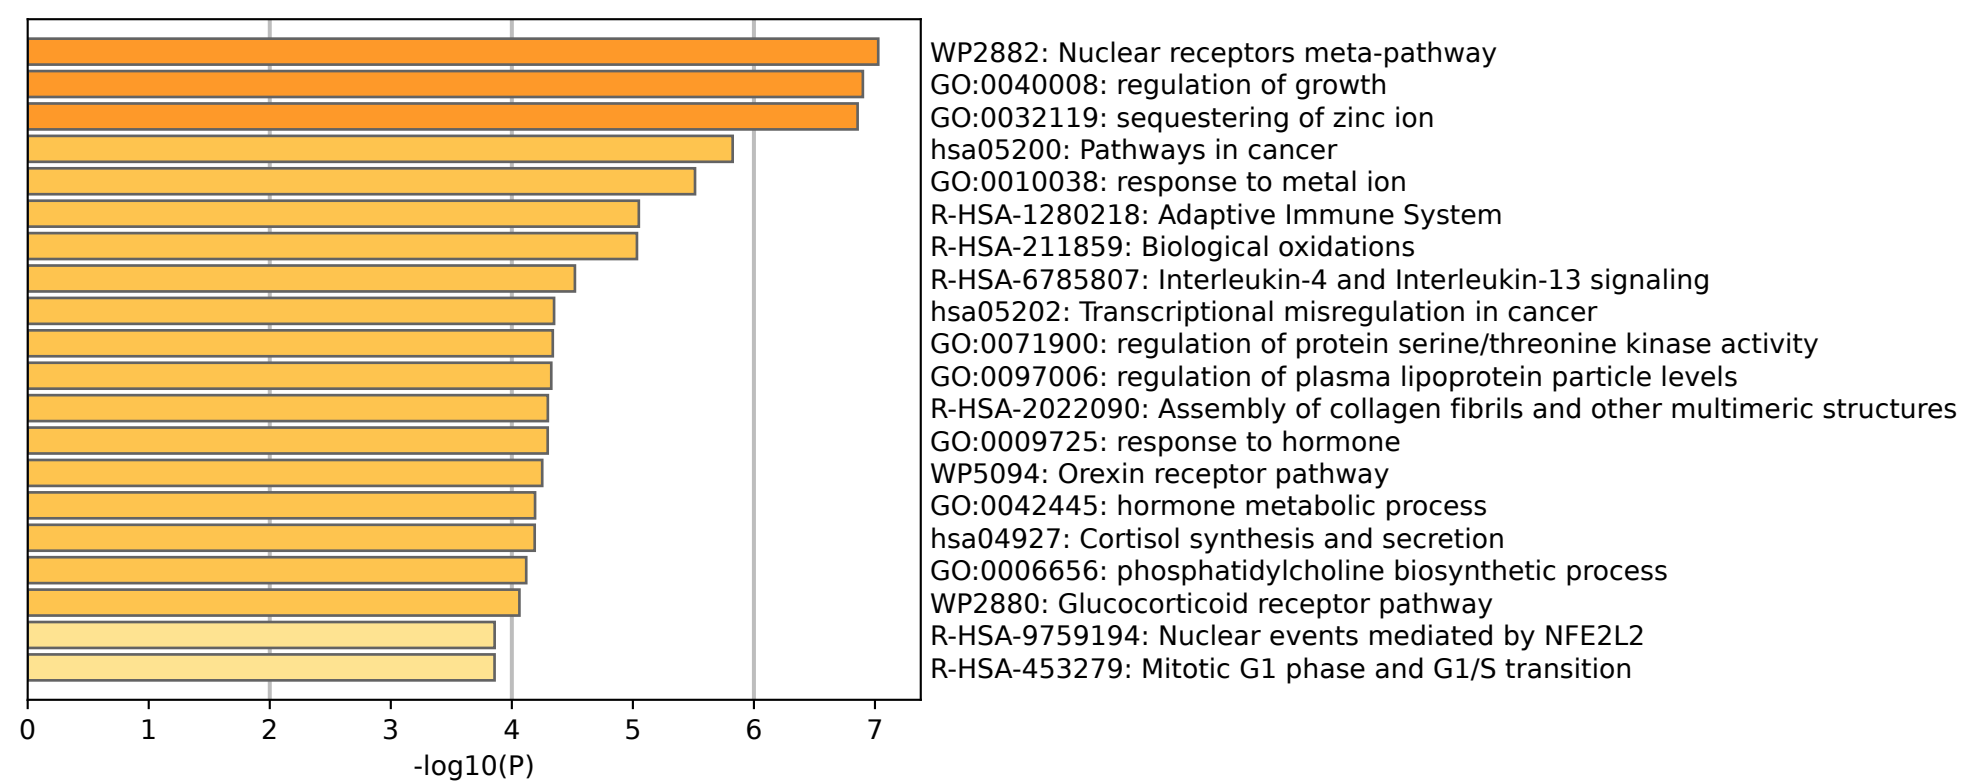

Supplement: s1 [file s1]

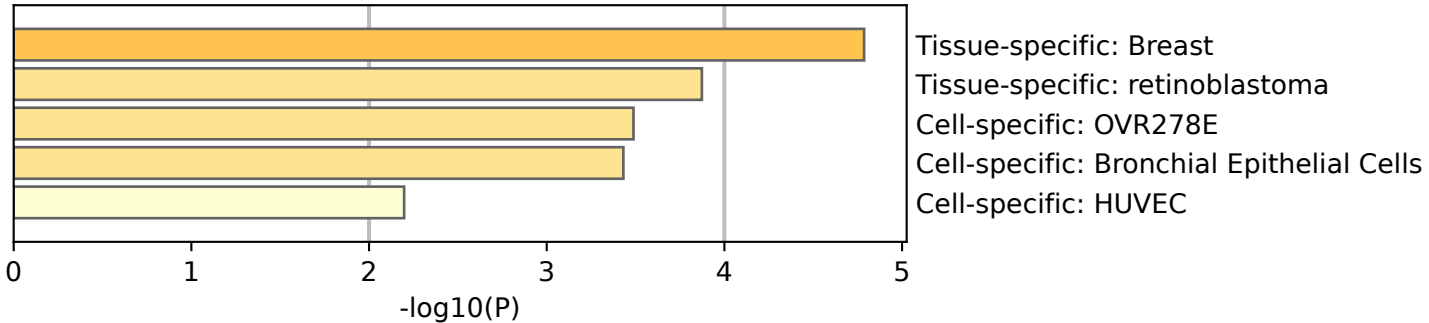

Supplement: s1 [file s1]

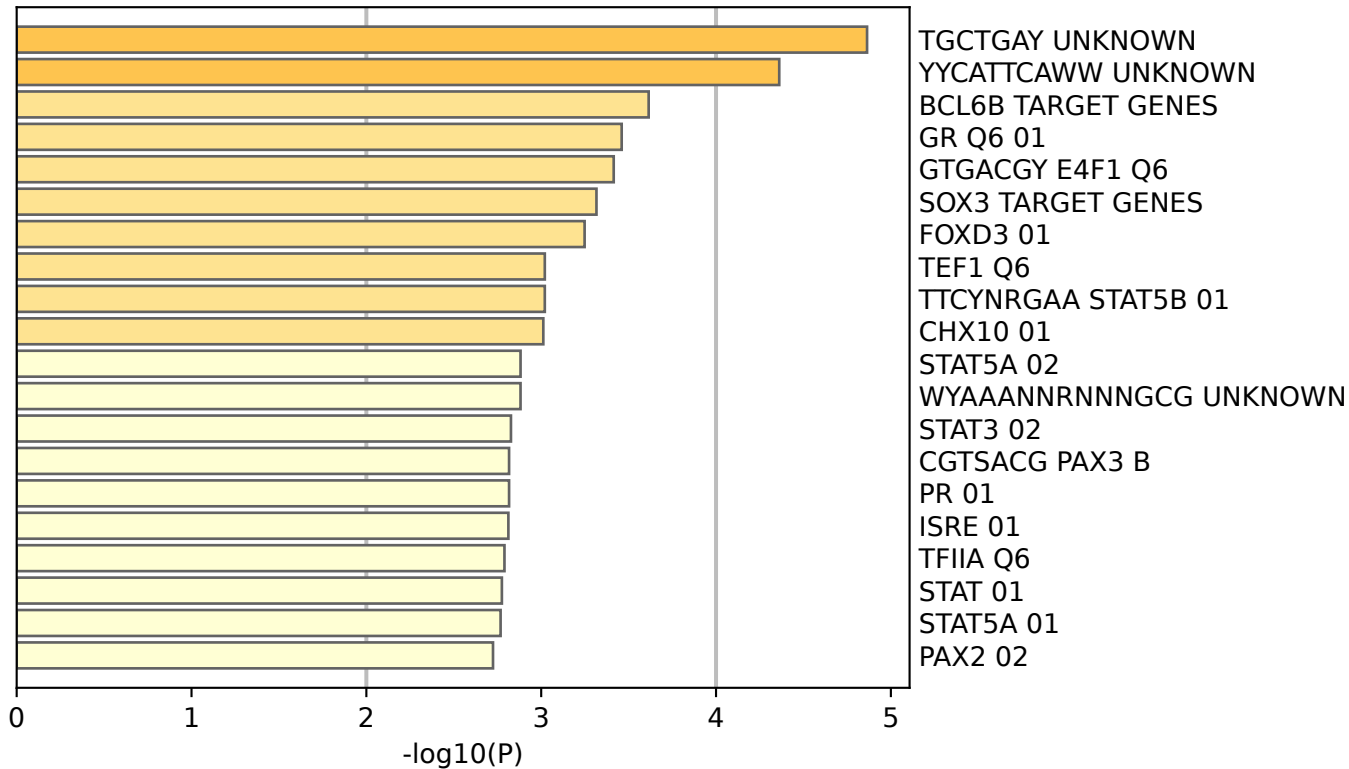

Supplement: s1 [file s1]

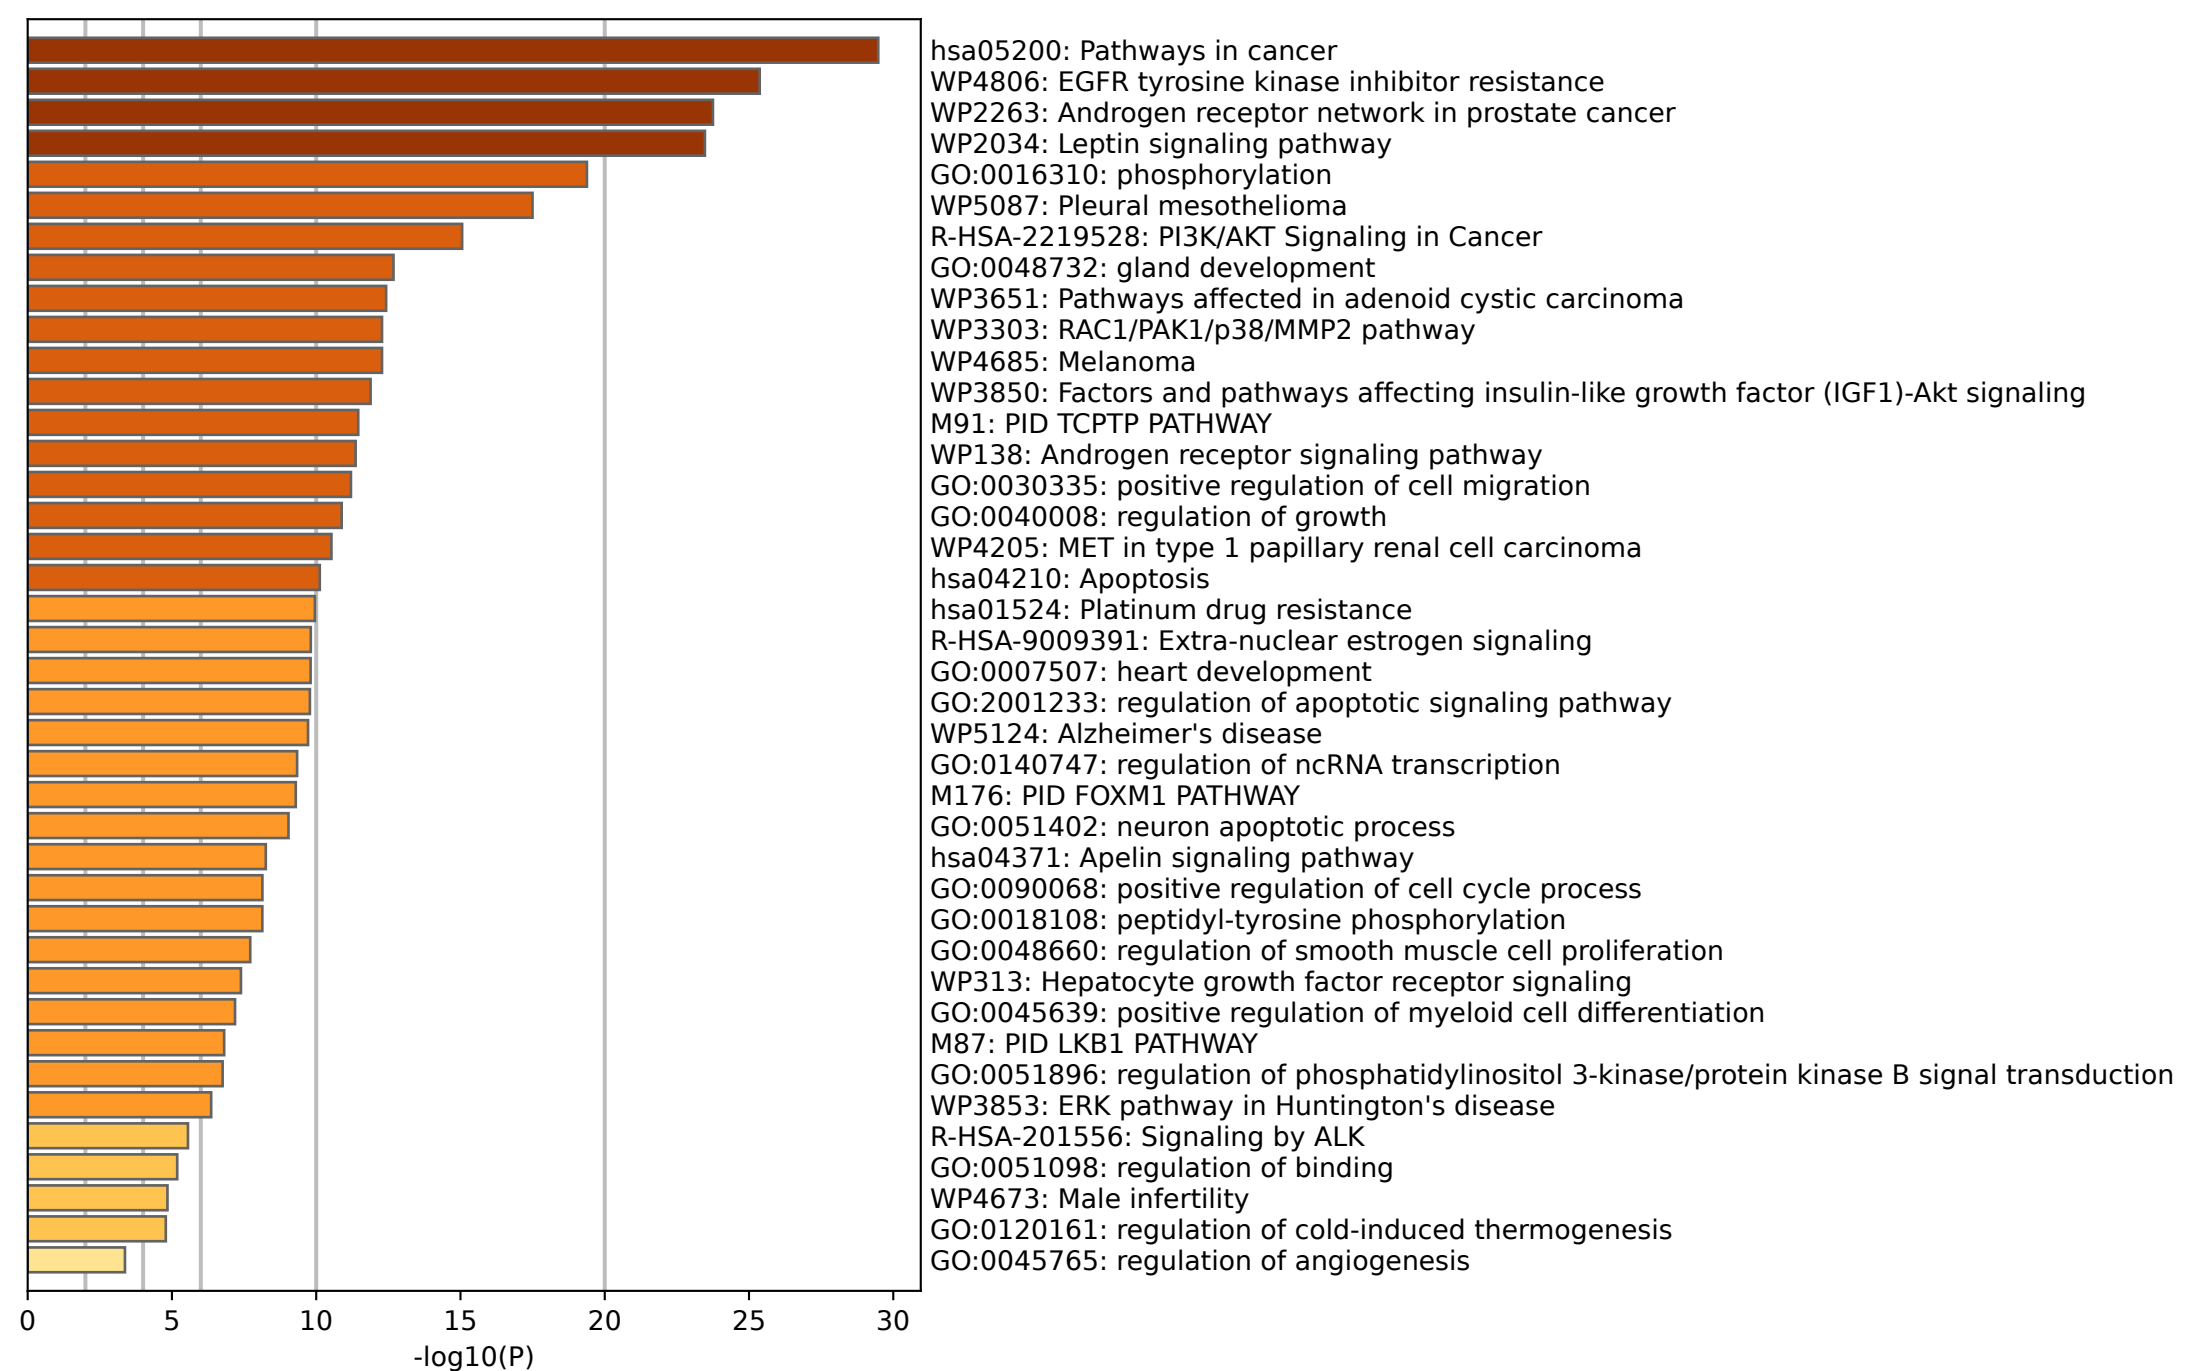

Supplement: s1 [file s1]

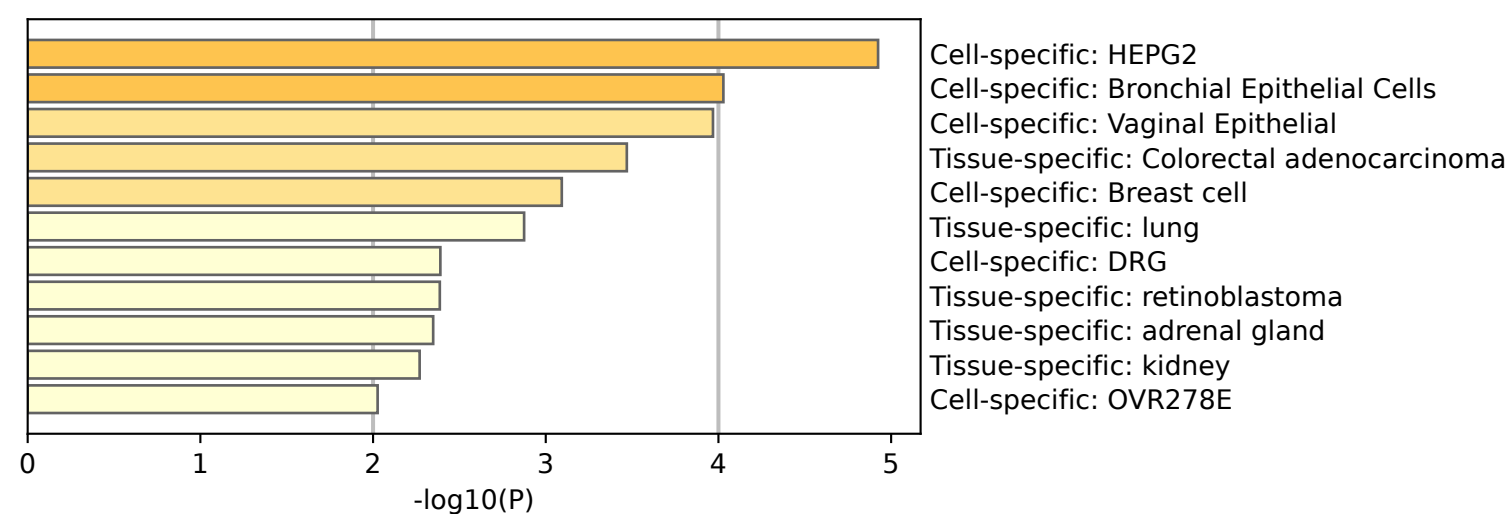

Supplement: s1 [file s1]

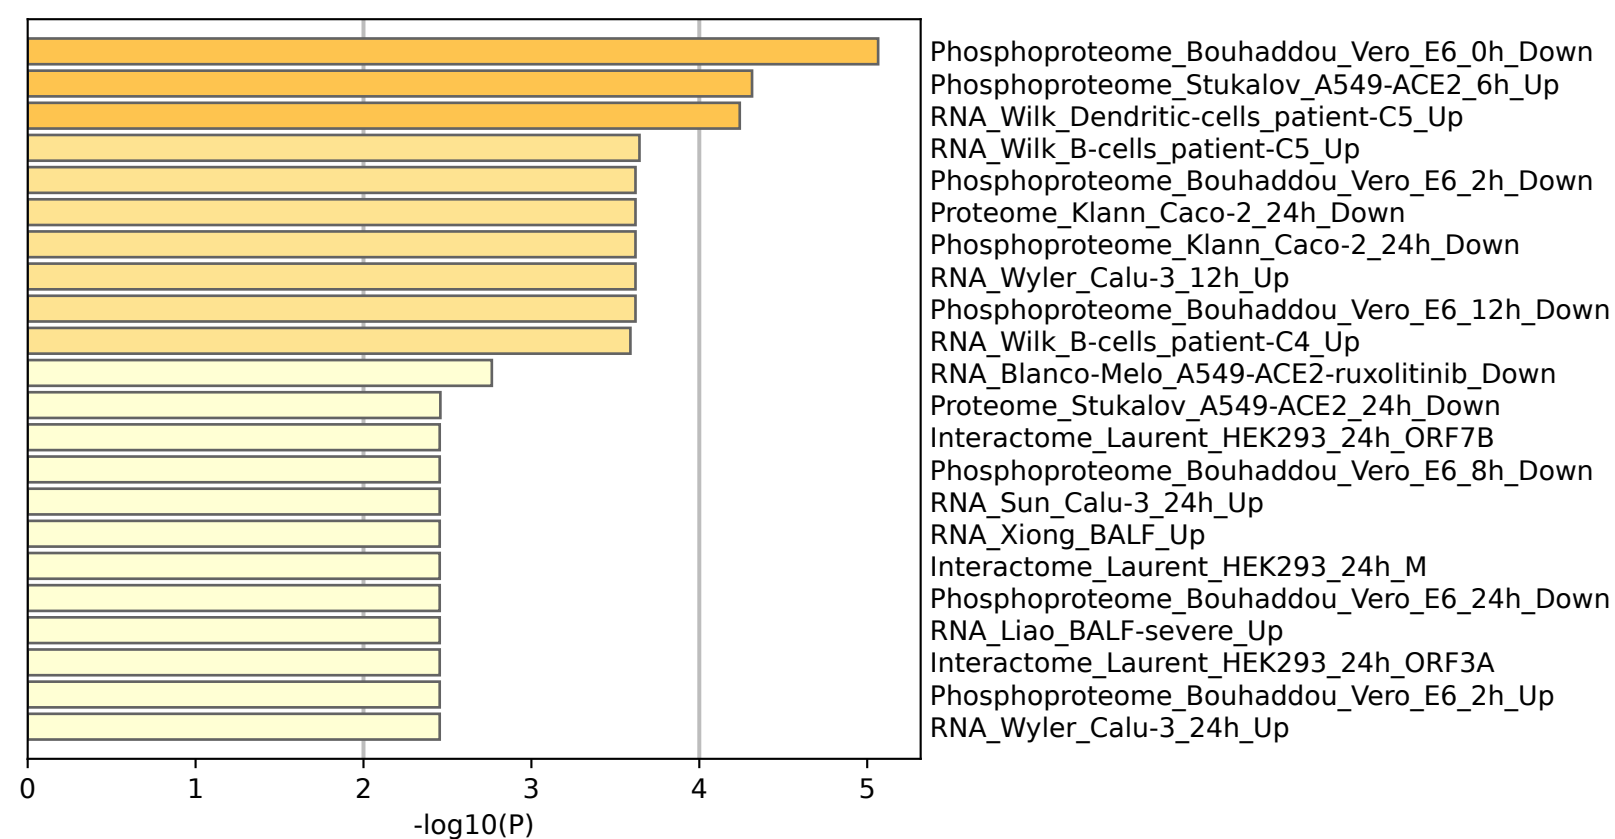

Supplement: s1 [file s1]

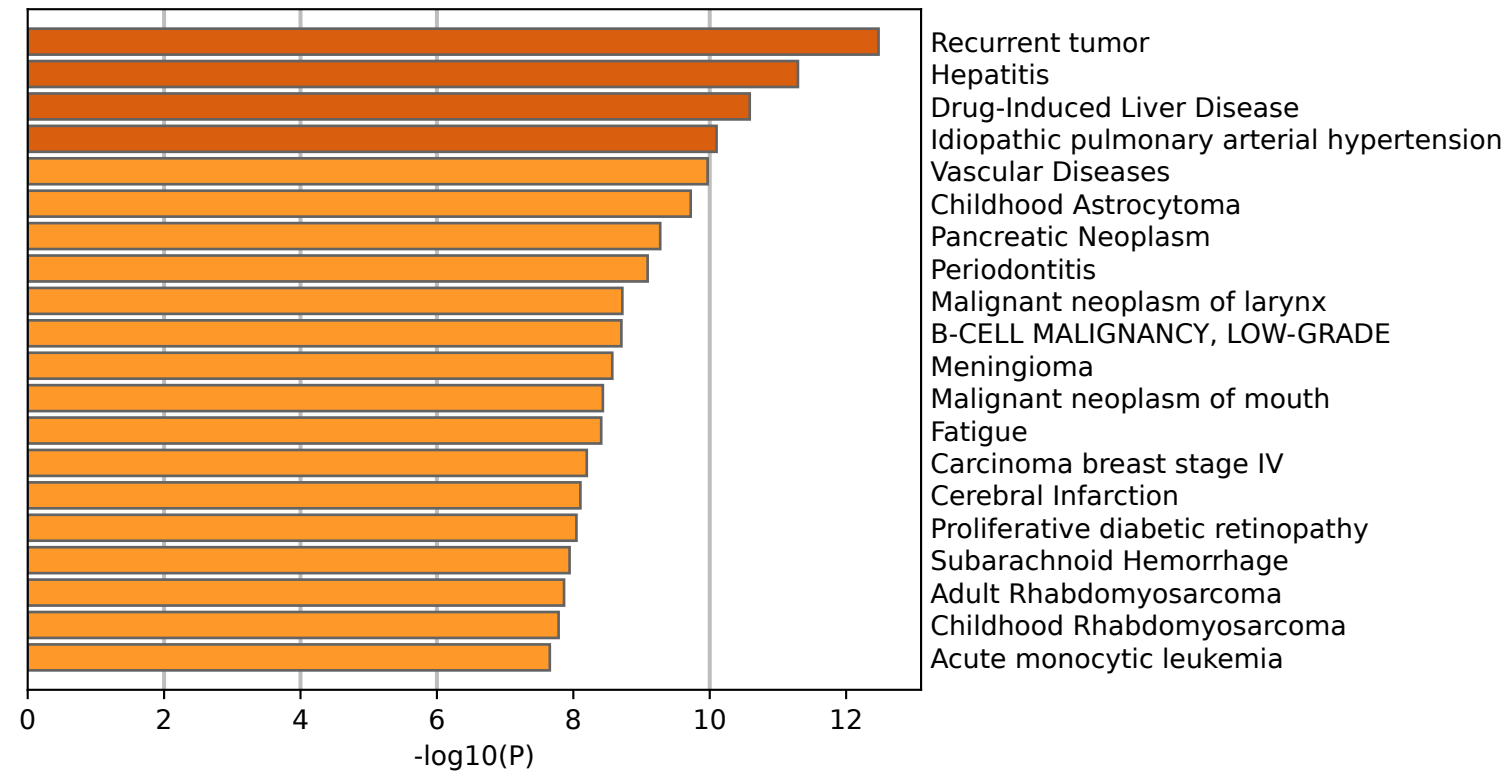

Supplement: s1 [file s1]

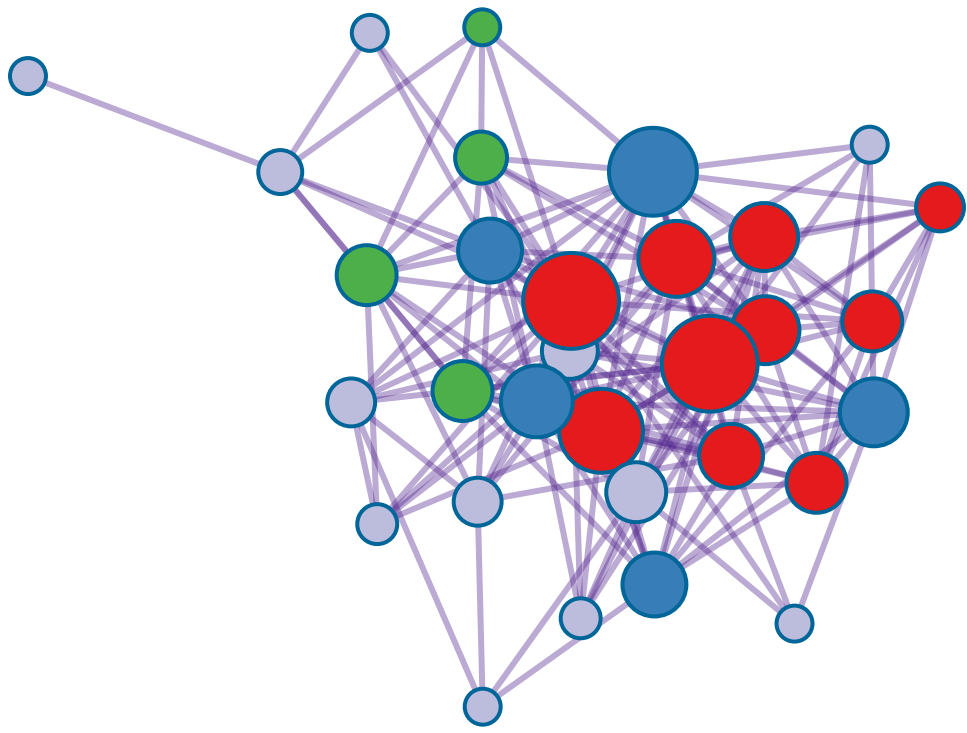

■ MCODE1  
■ MCODE2  
■ MCODE3

 created by  
<http://metascape.org>

Supplement: s1 [file s1]

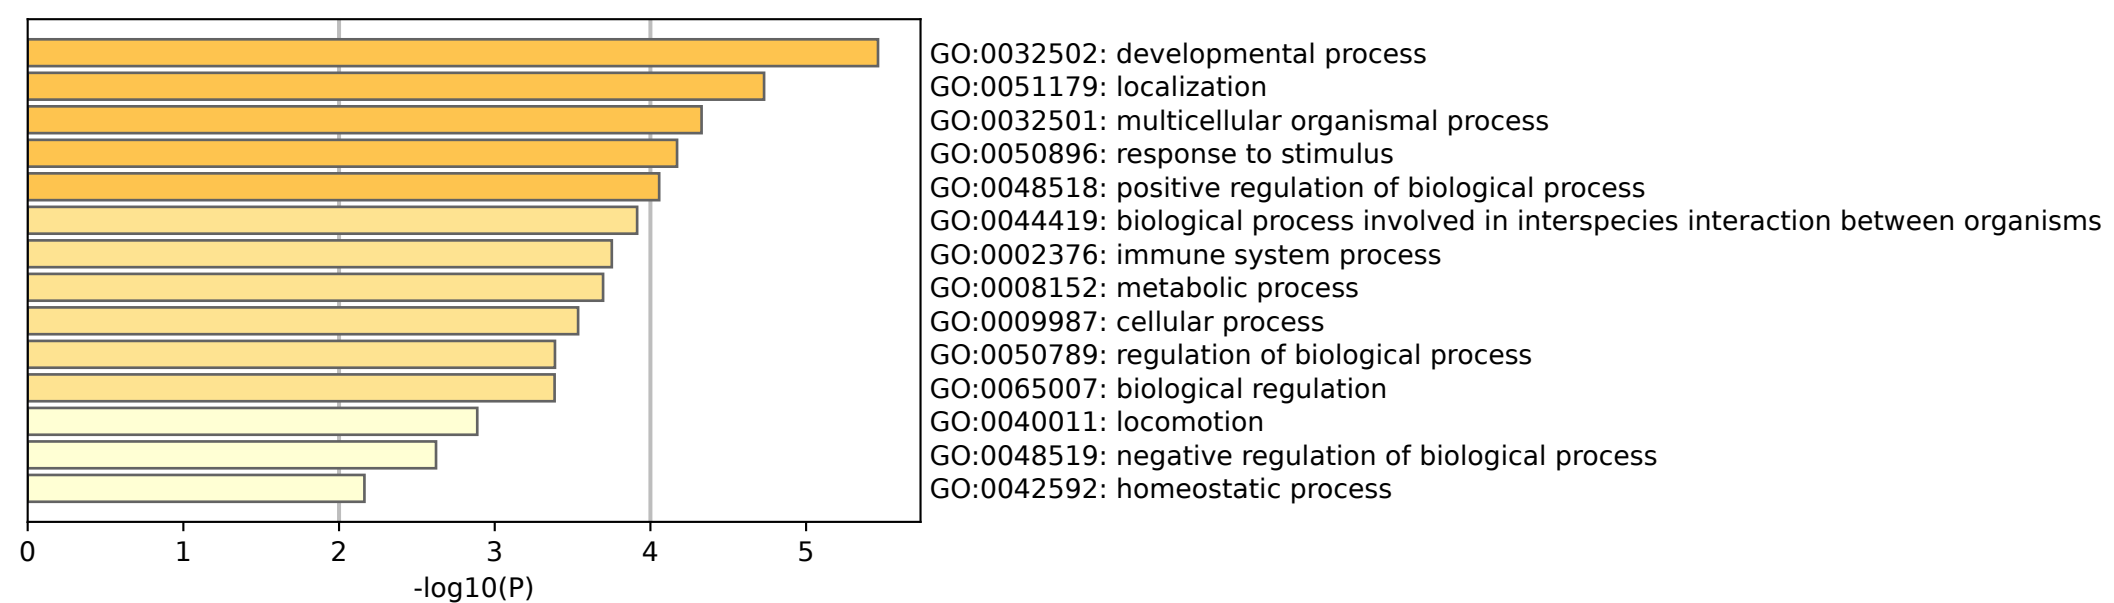

Supplement: s1 [file s1]

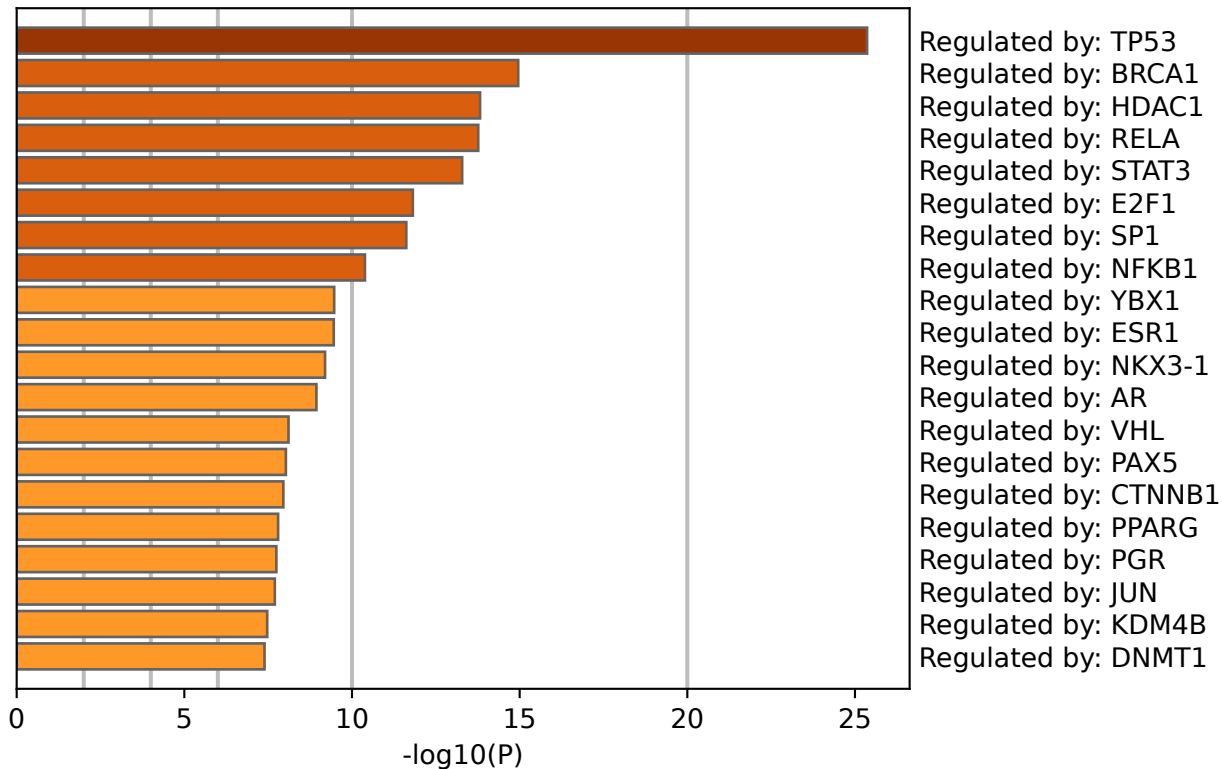

Supplement: s1 [file s1]

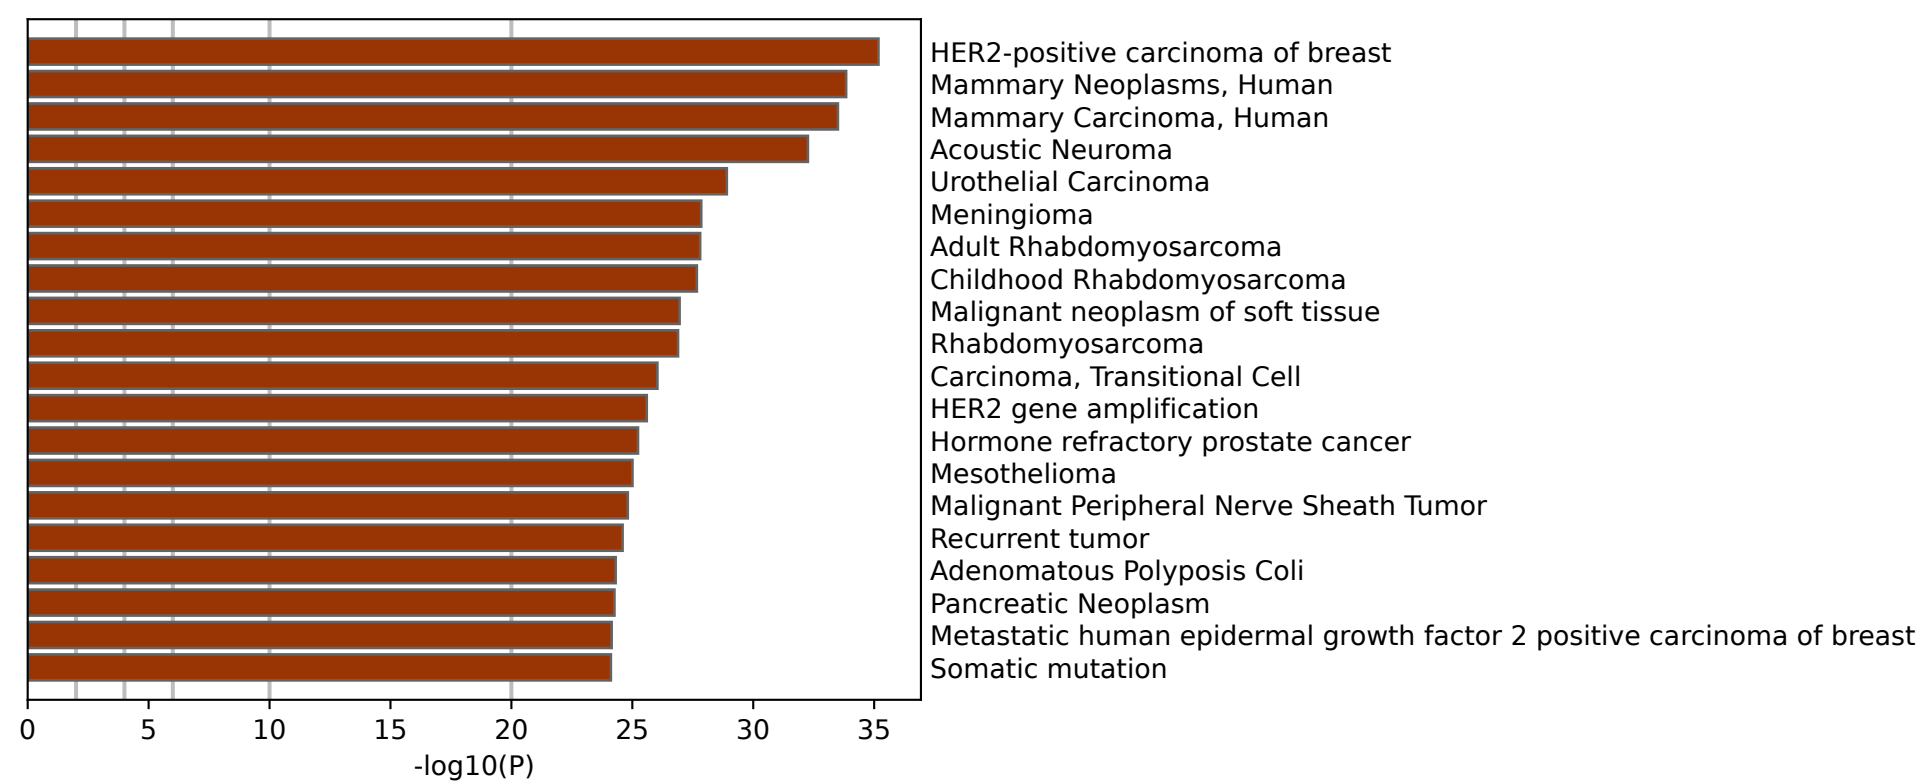

Supplement: s1 [file s1]

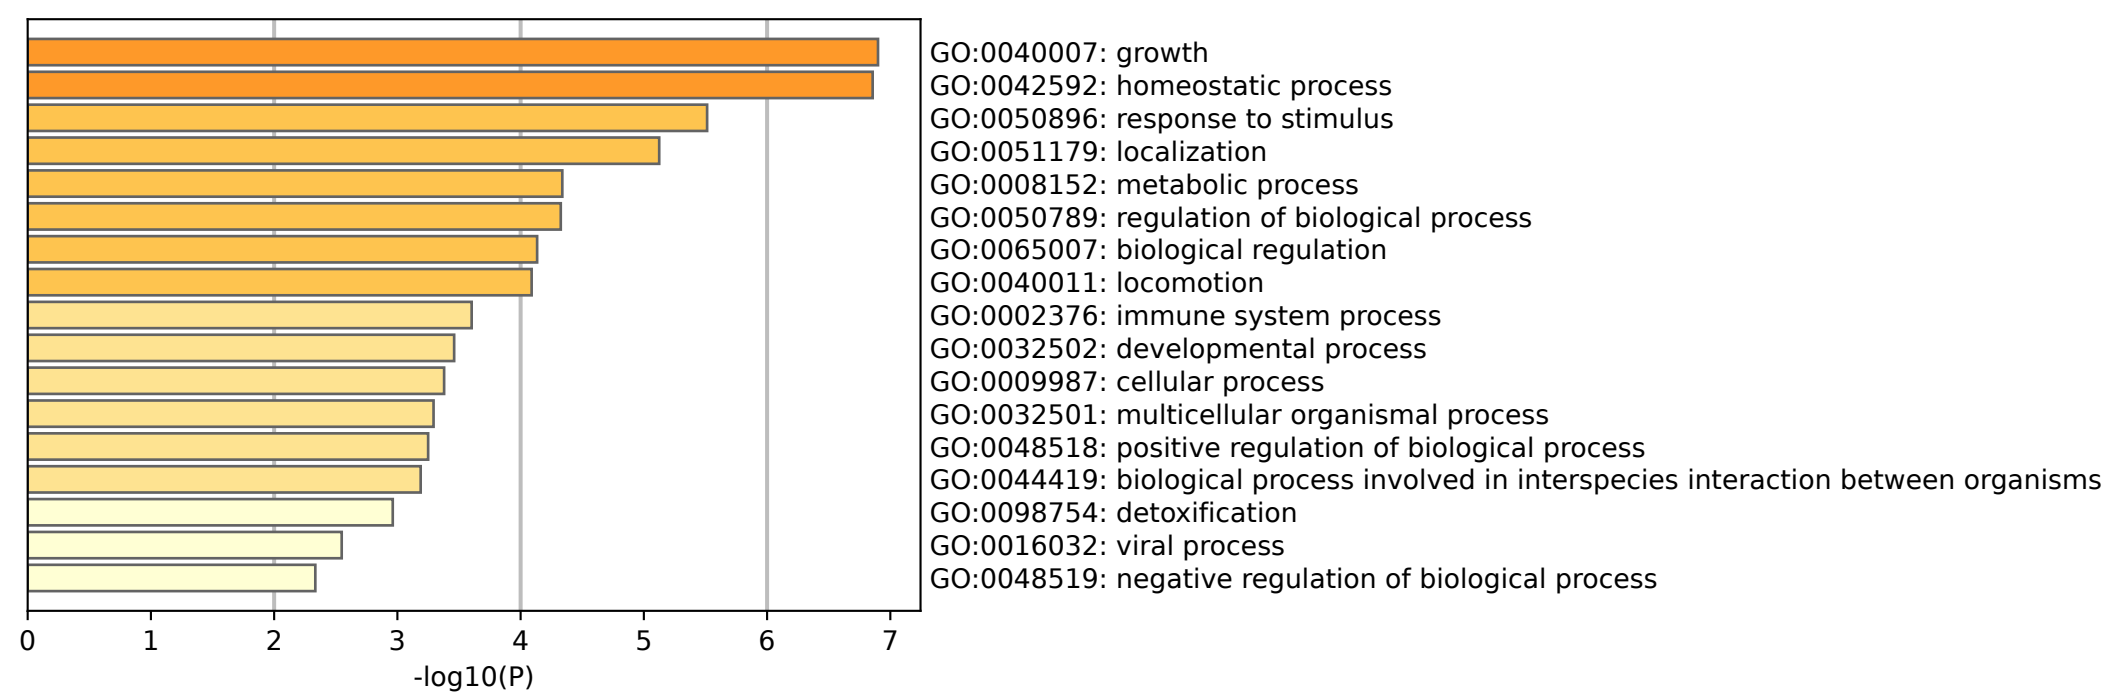

Supplement: s1 [file s1]

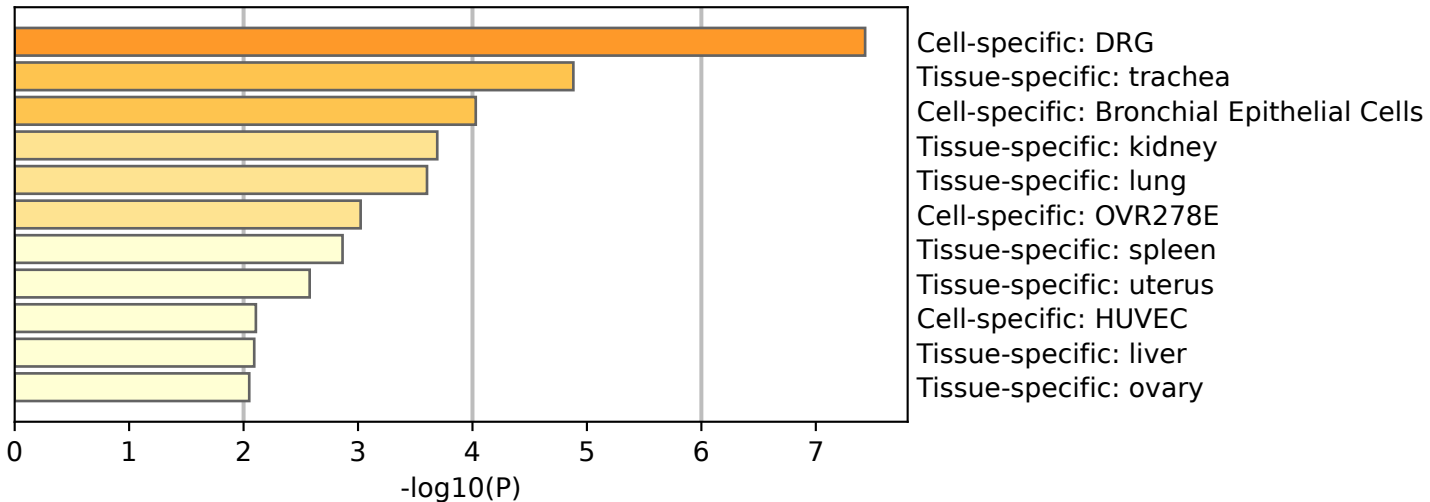

Supplement: s1 [file s1]
